# Supplementary material
Source: PubMed Central journal article supplement (PMC2935626)

**2b: (S)-1-fluoro-4-(2-(phenylsulfonyl)pent-4-en-2-yl)benzene**

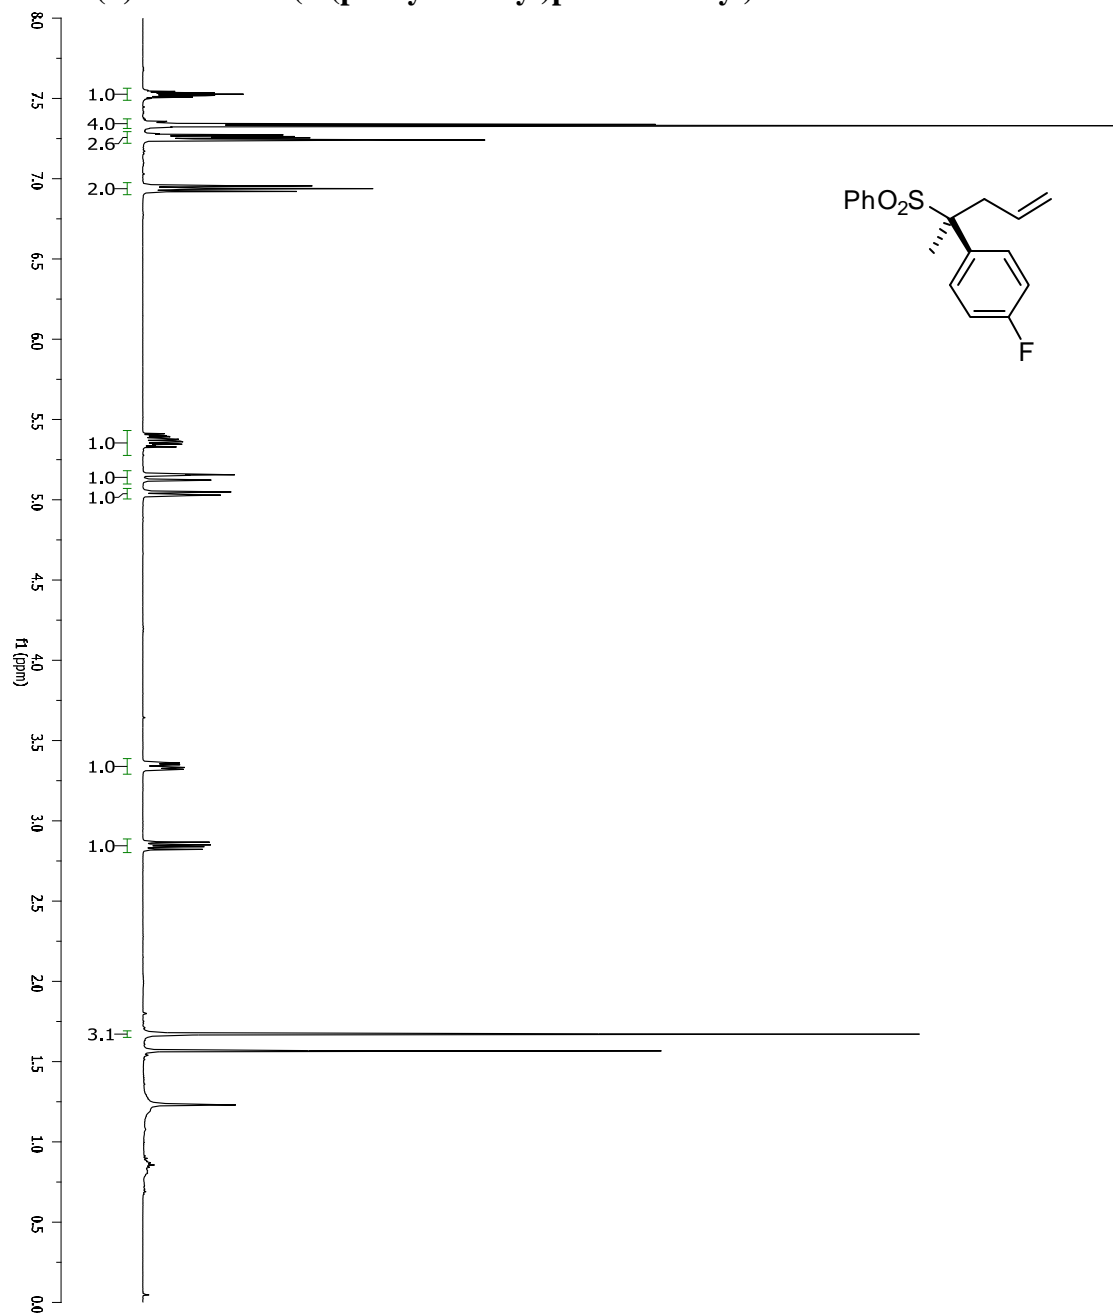

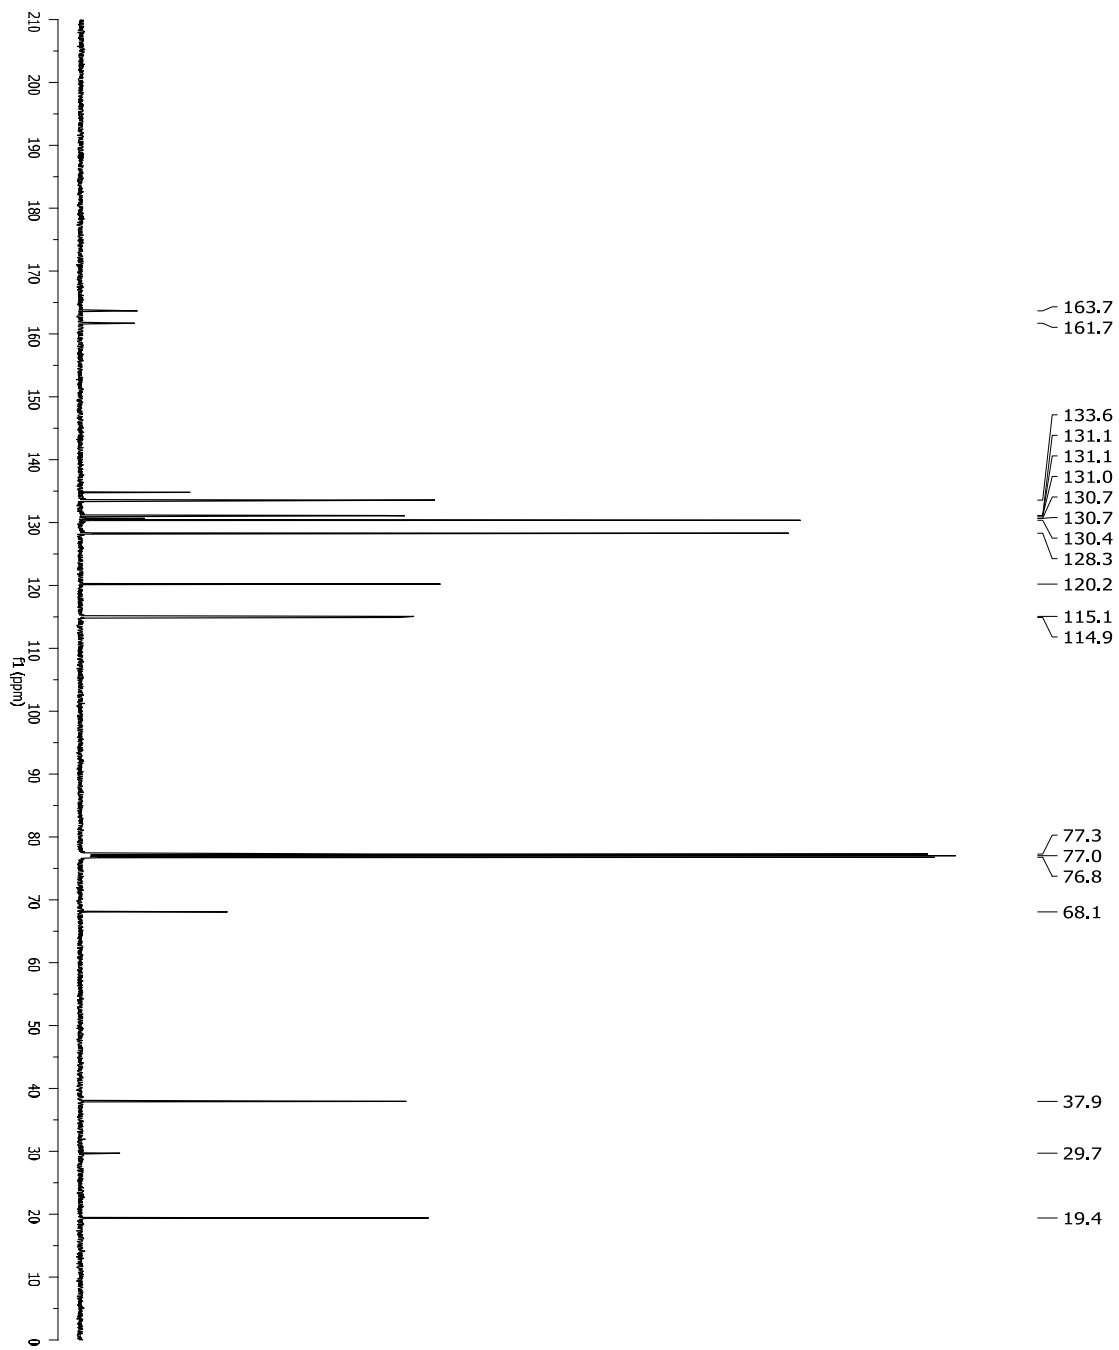

**2c: (R)-1-chloro-4-(2-(phenylsulfonyl)pent-4-en-2-yl)benzene**

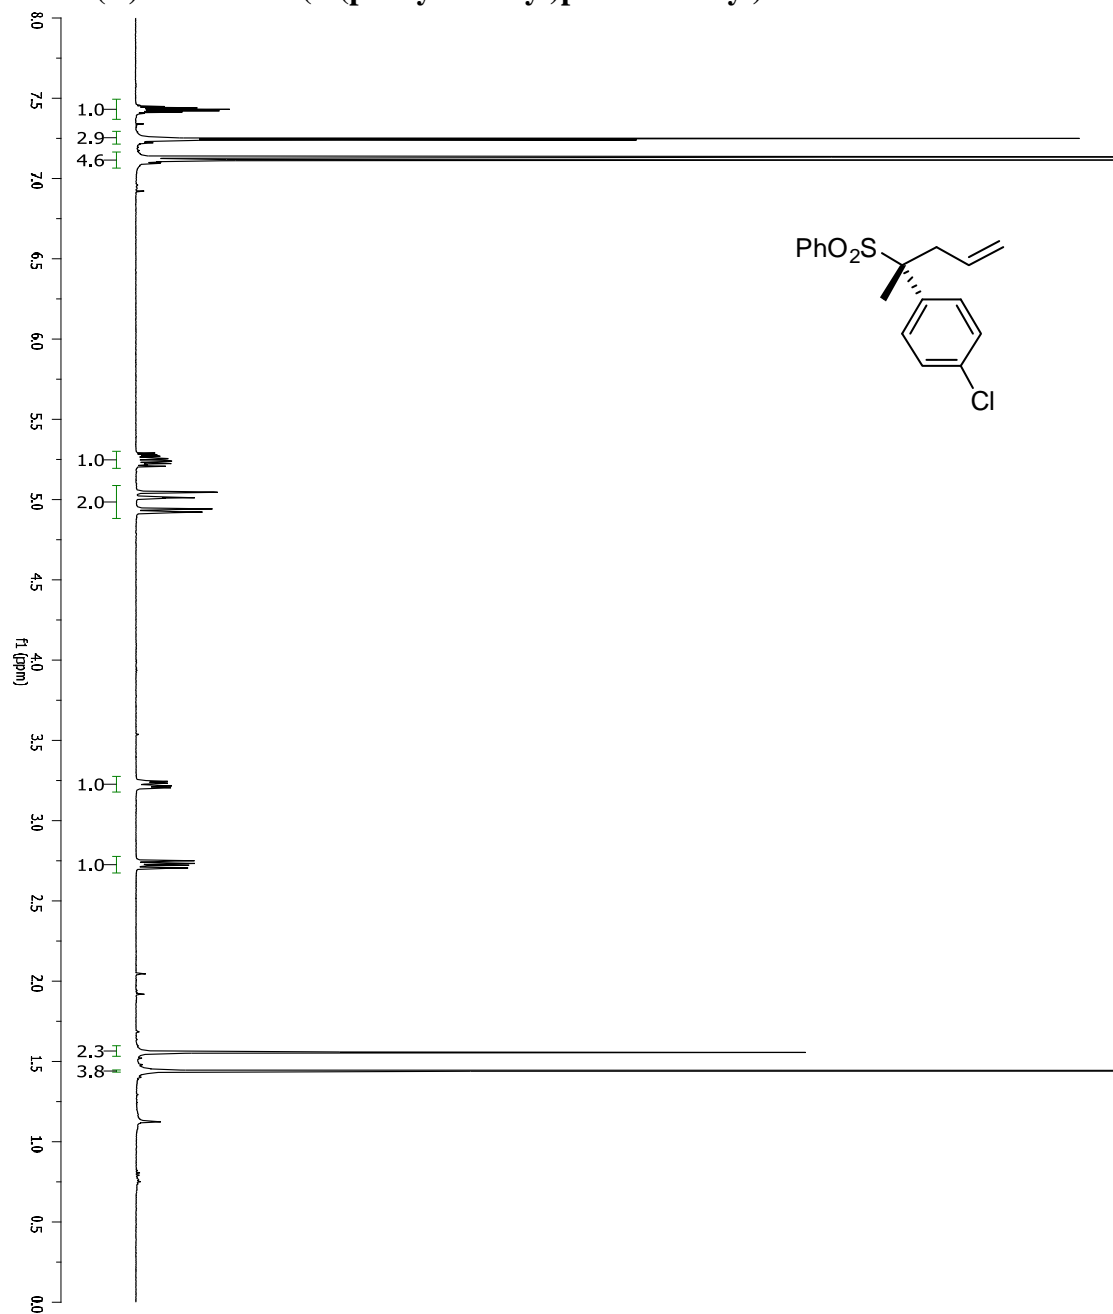

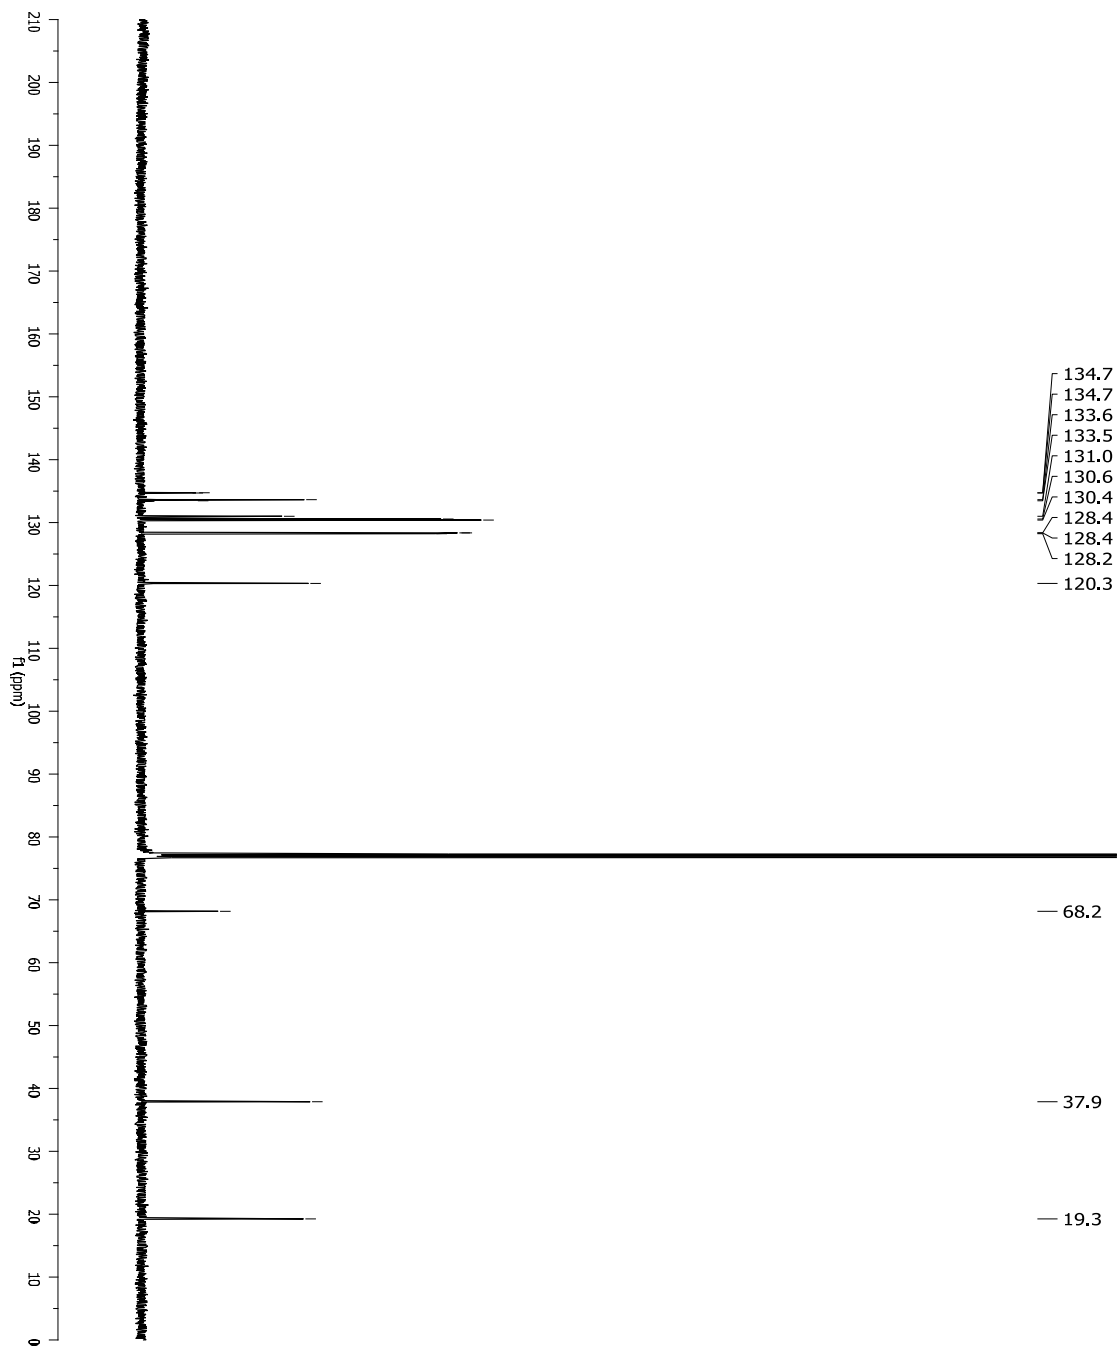

**2d: (S)-1-bromo-4-(2-(phenylsulfonyl)pent-4-en-2-yl)benzene**

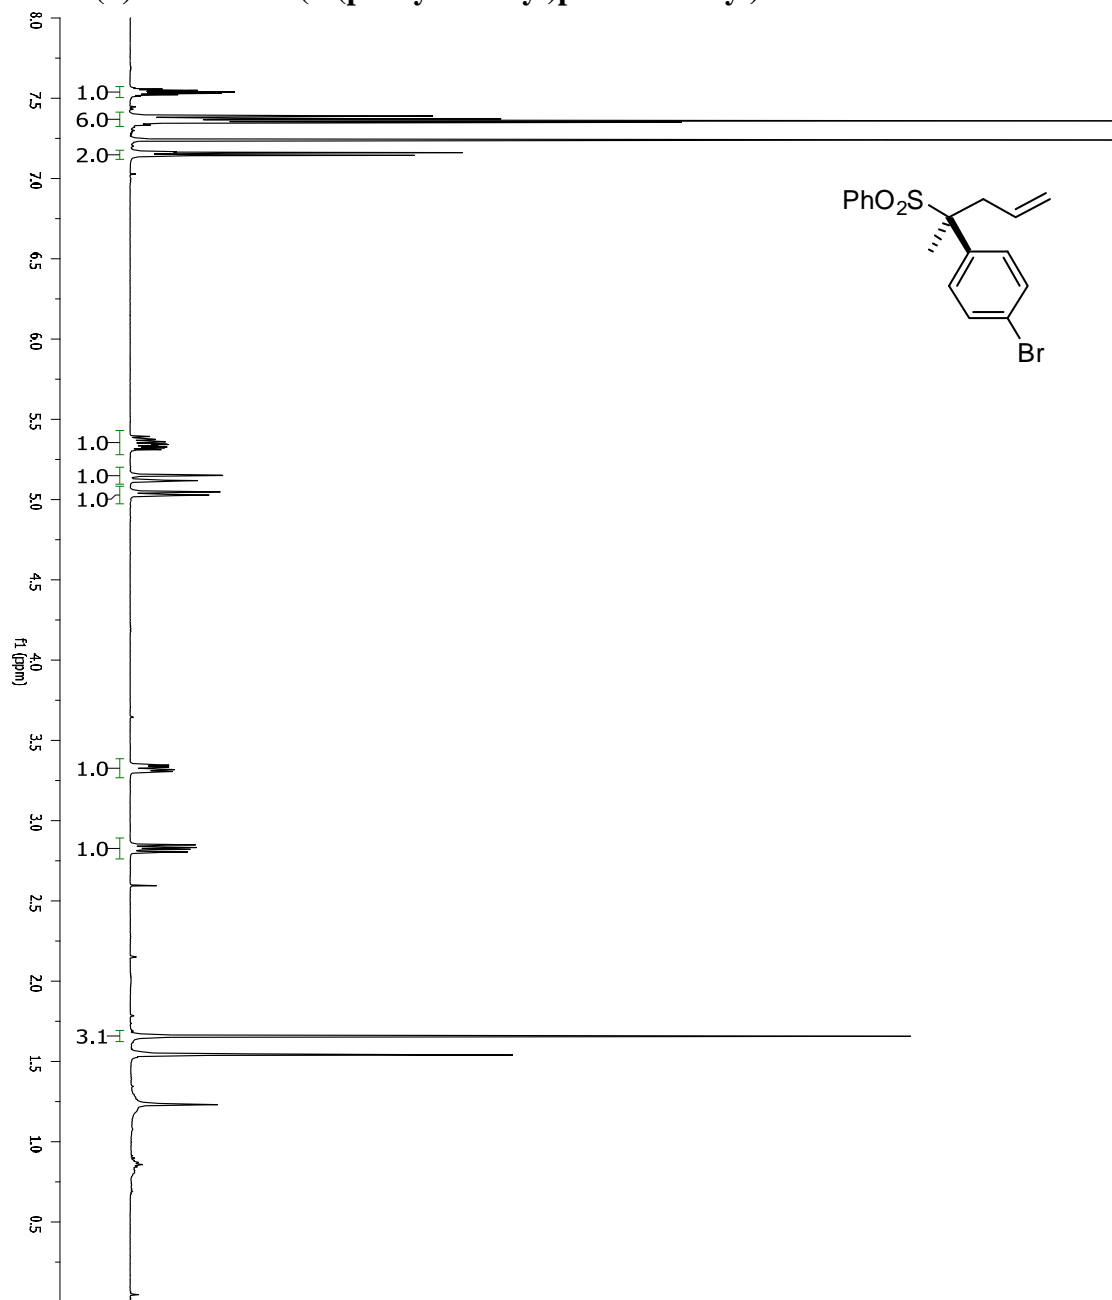

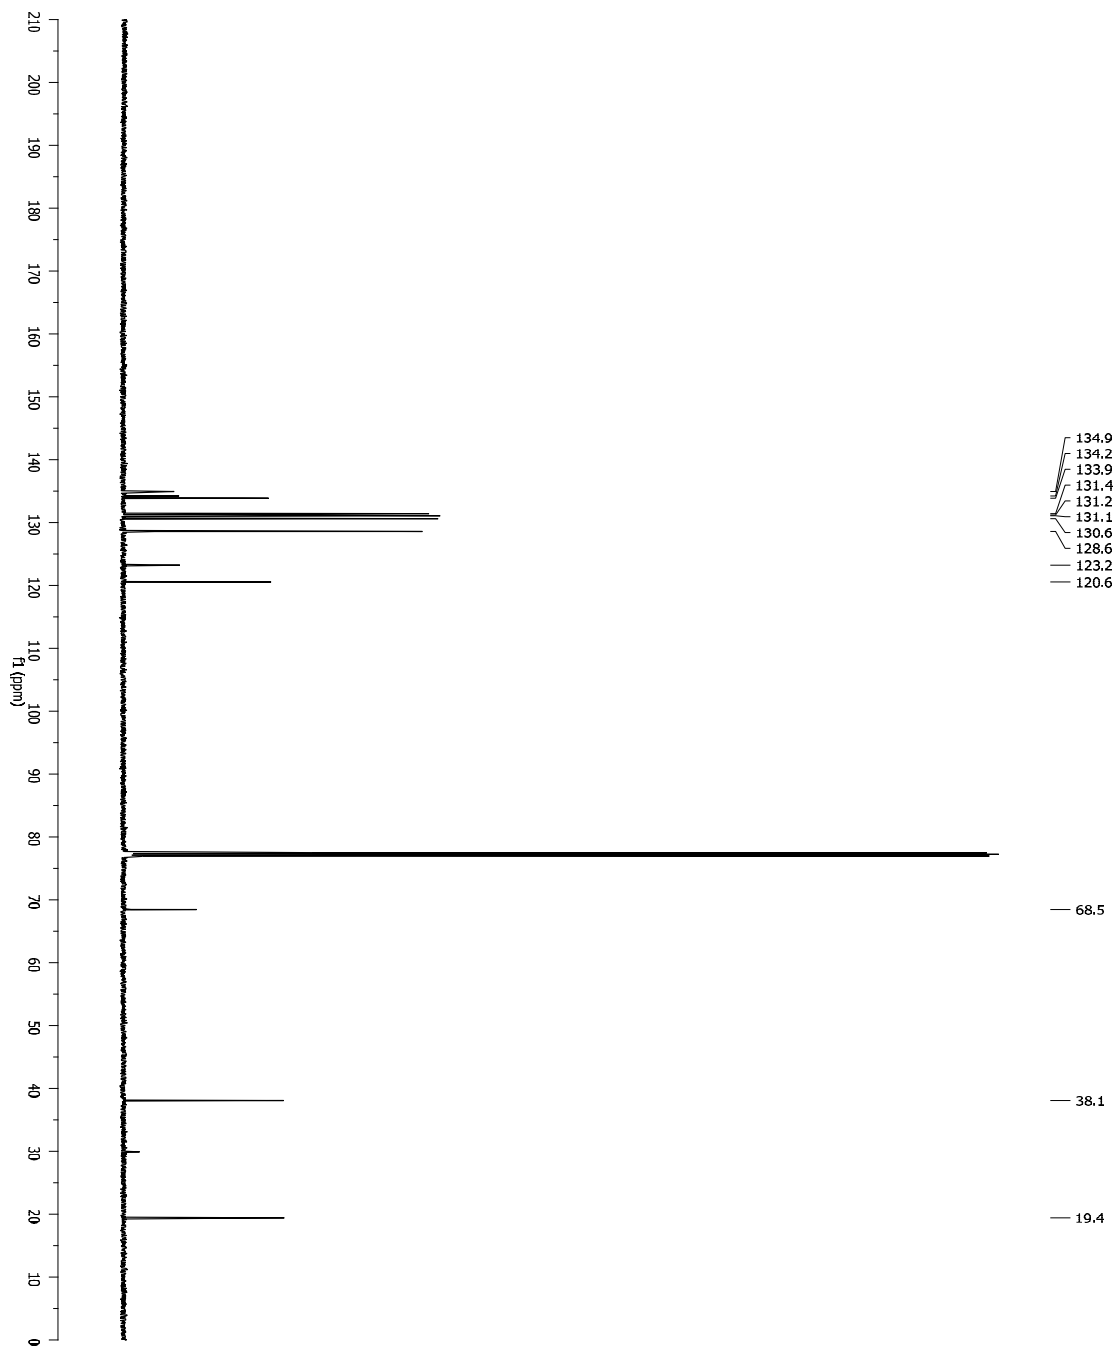

**2e: (R,E)-1-chloro-4-(5-phenyl-2-(phenylsulfonyl)pent-4-en-2-yl)benzene**

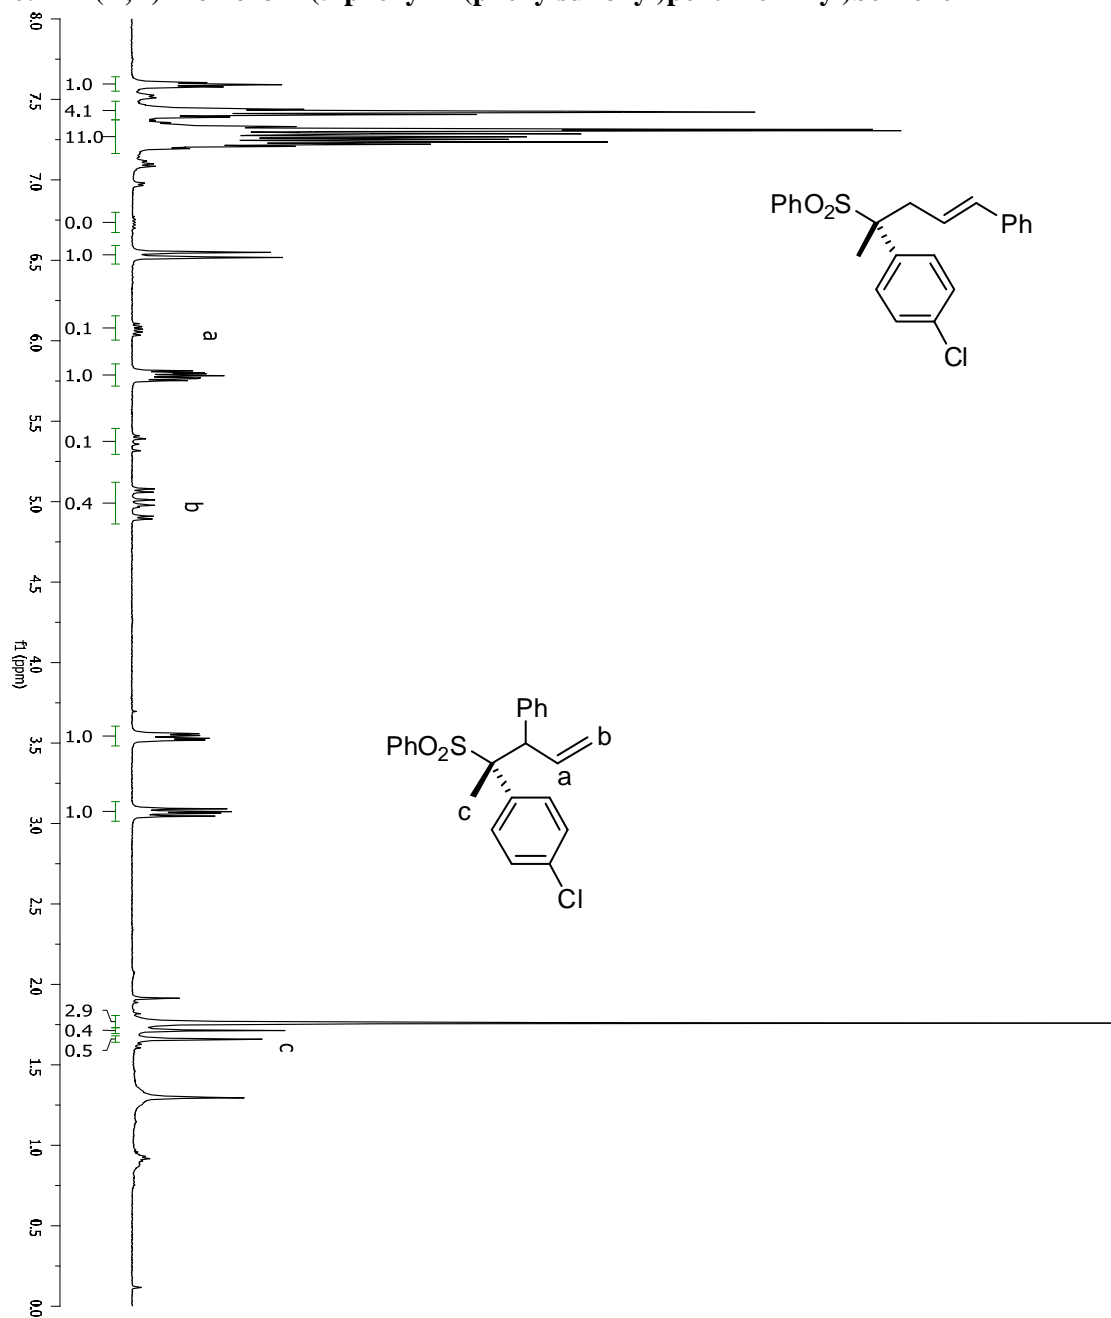

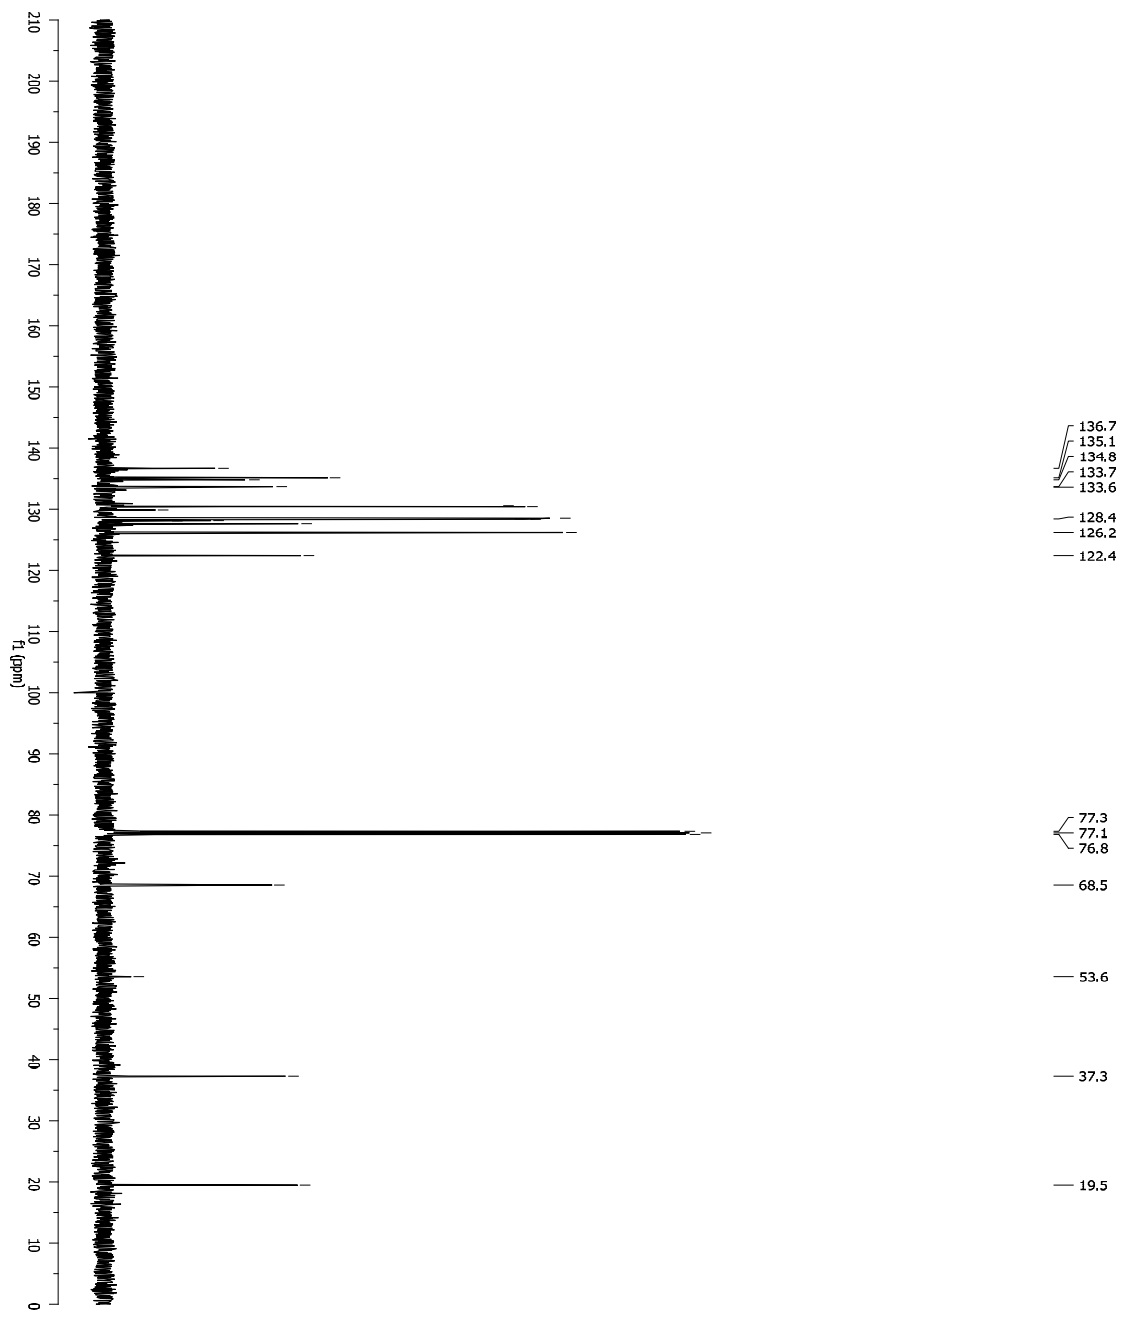



**2f: (S,E)-1-fluoro-4-(5-phenyl-2-(phenylsulfonyl)pent-4-en-2-yl)benzene**

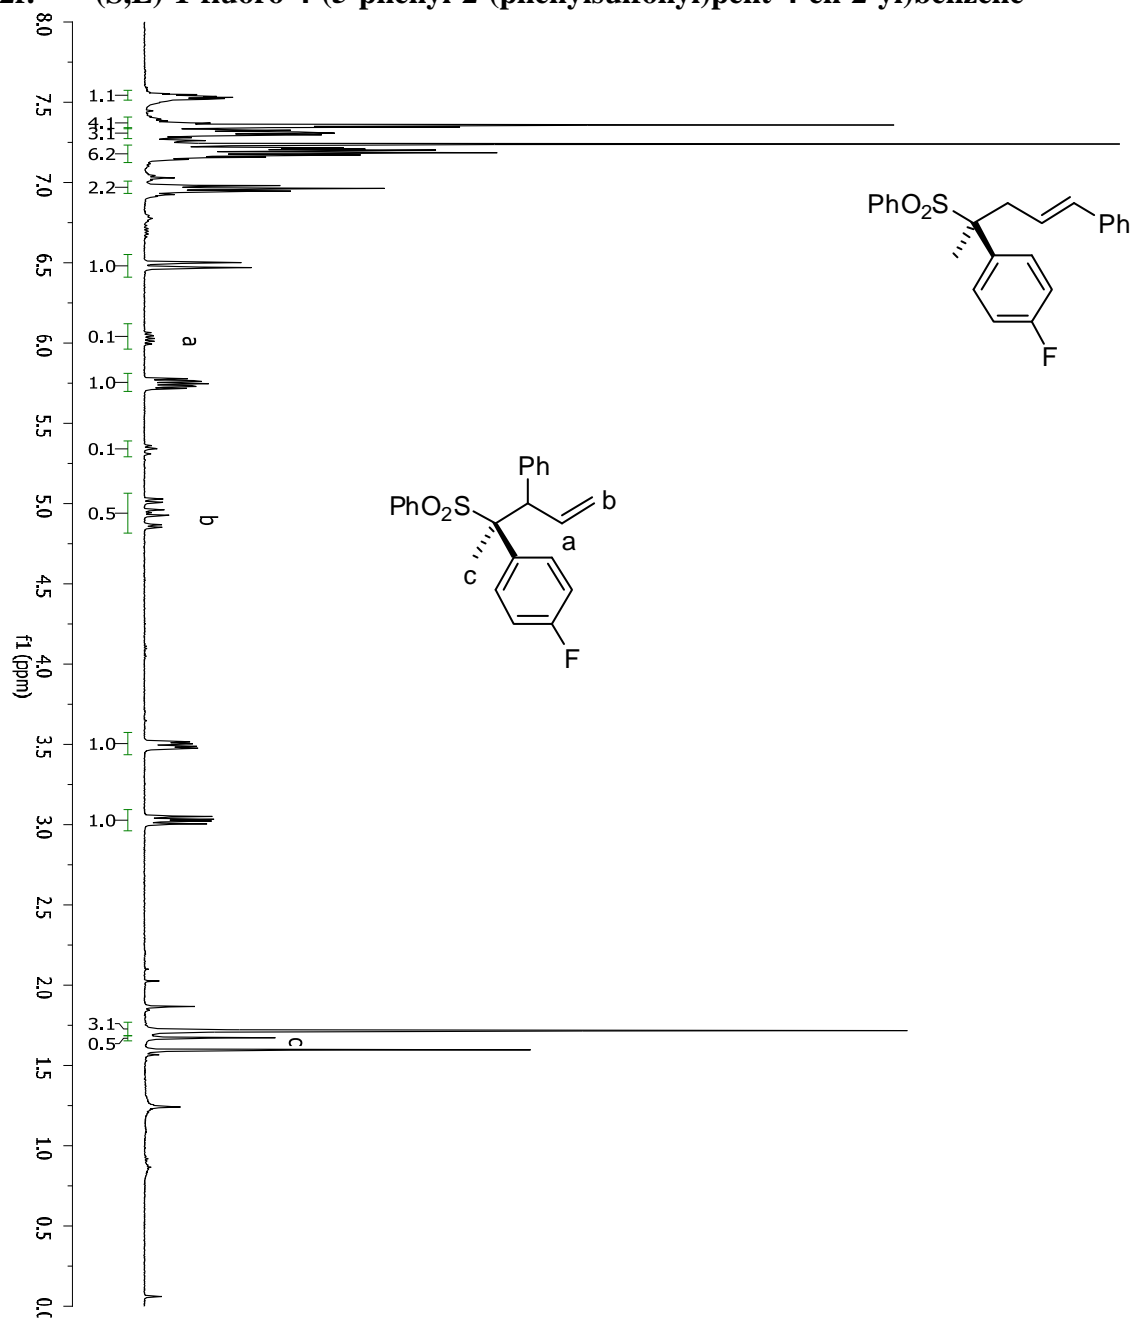

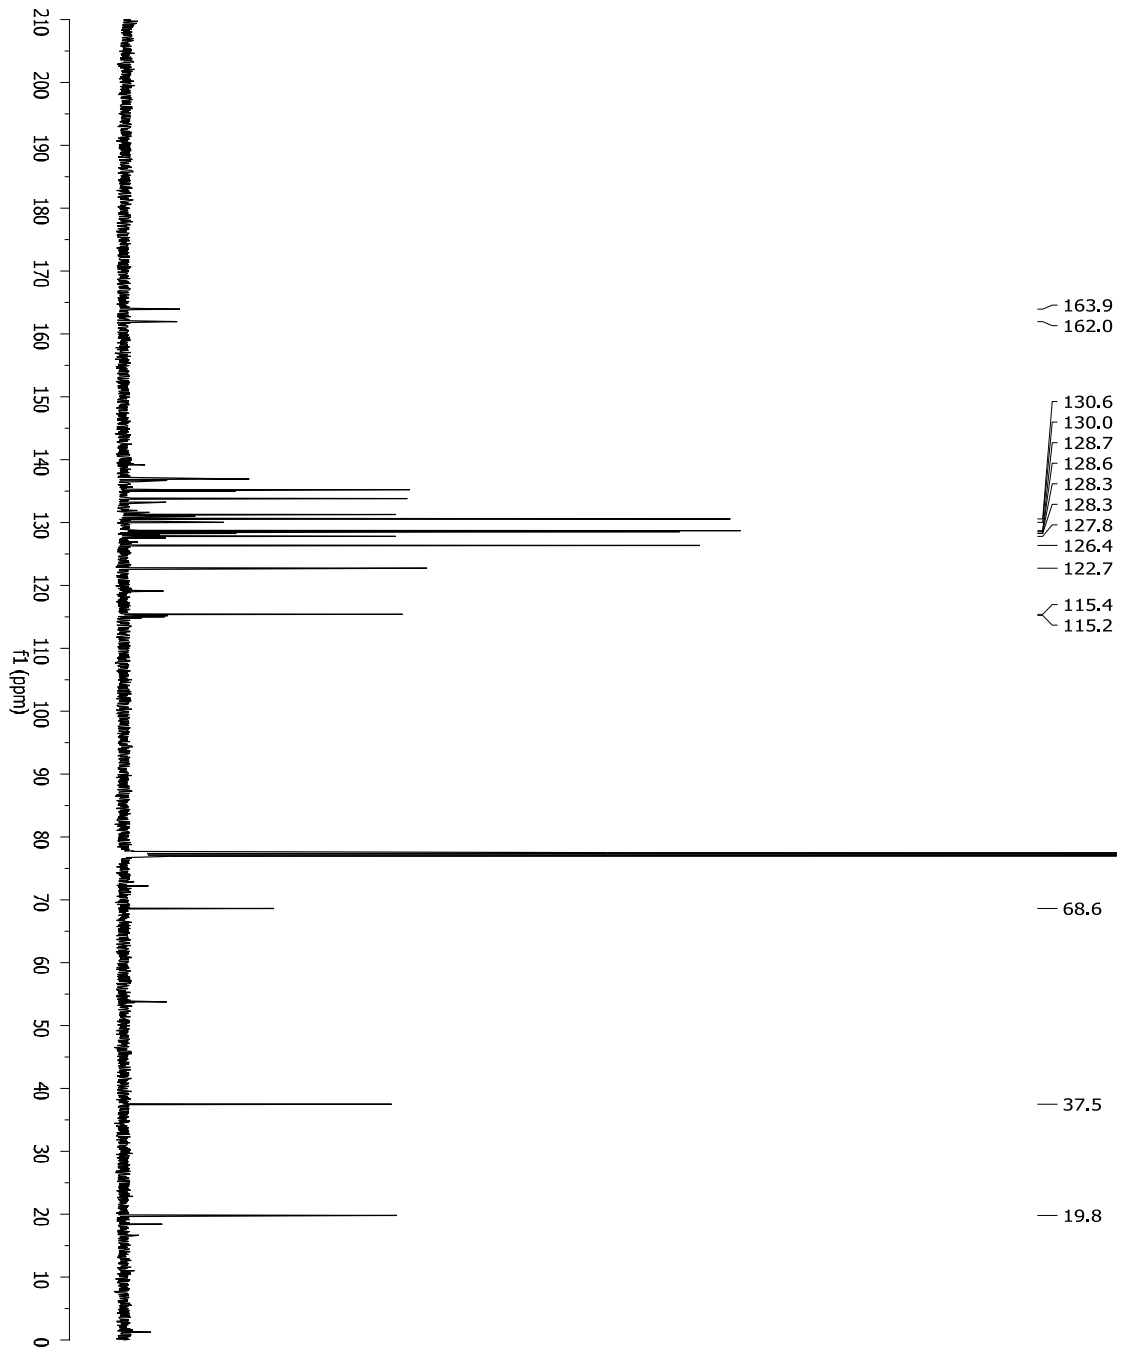

2g: (S)-4-methyl-2-(phenylsulfonyl)pent-4-en-2-ylbenzene

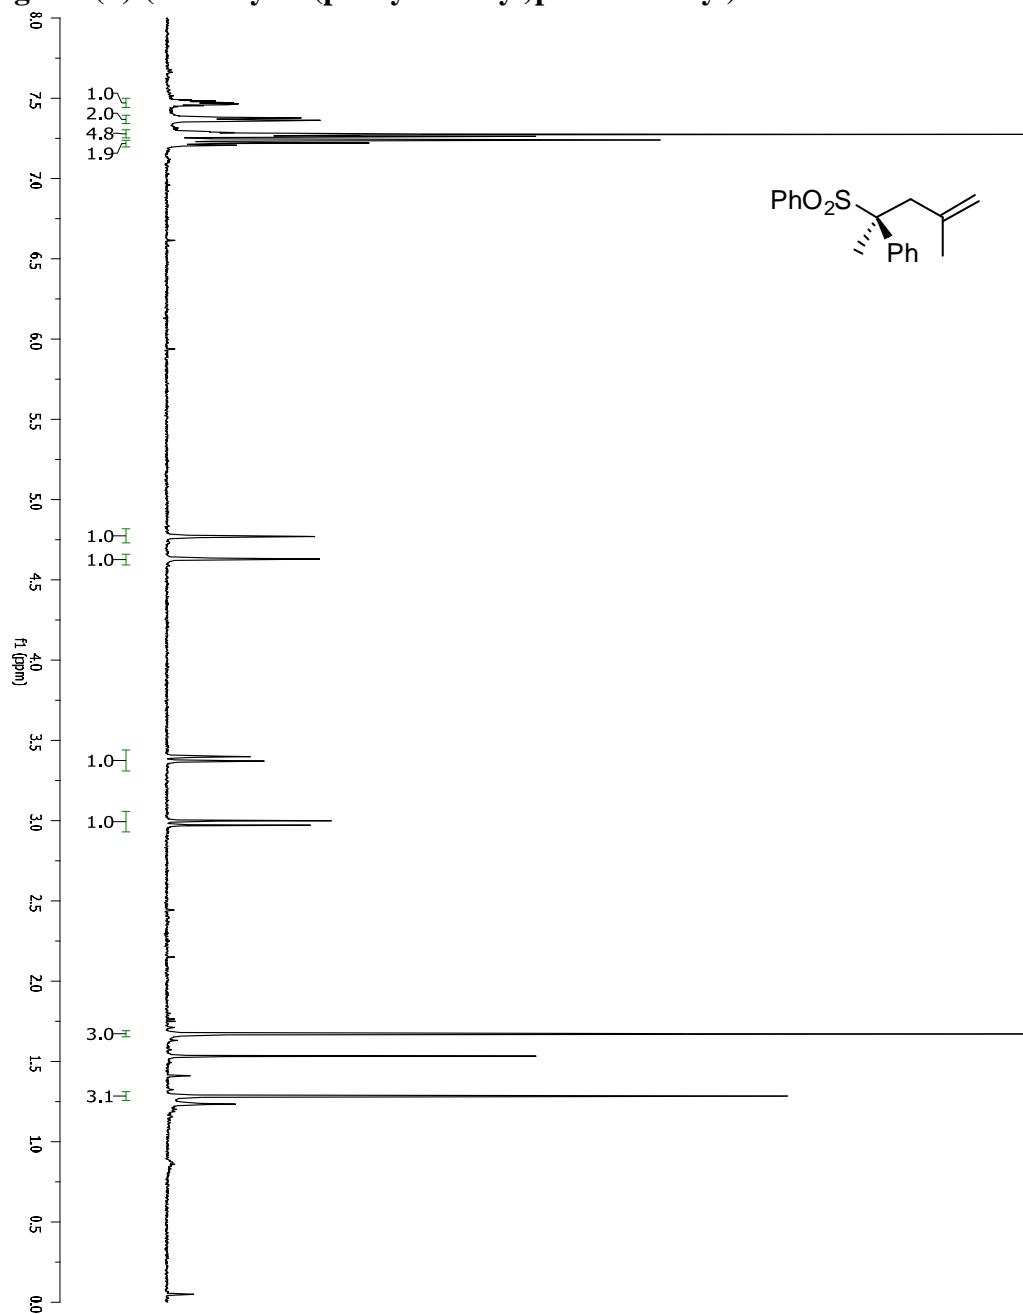

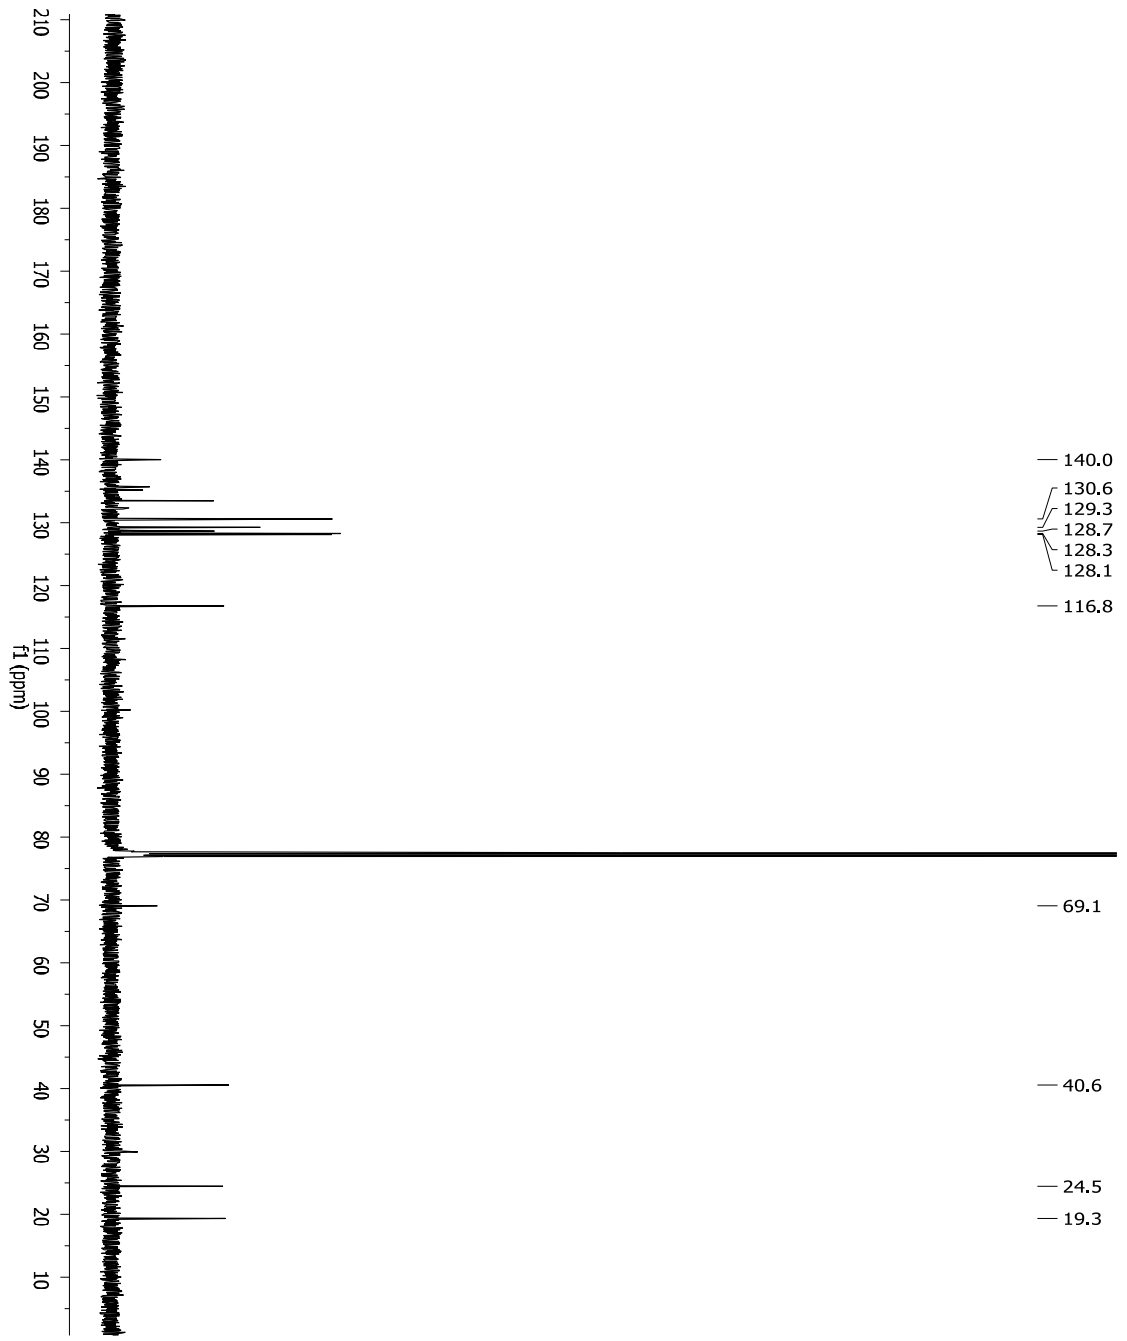

**2h: (S)-1-bromo-4-(4-methyl-2-(phenylsulfonyl)pent-4-en-2-yl)benzene**

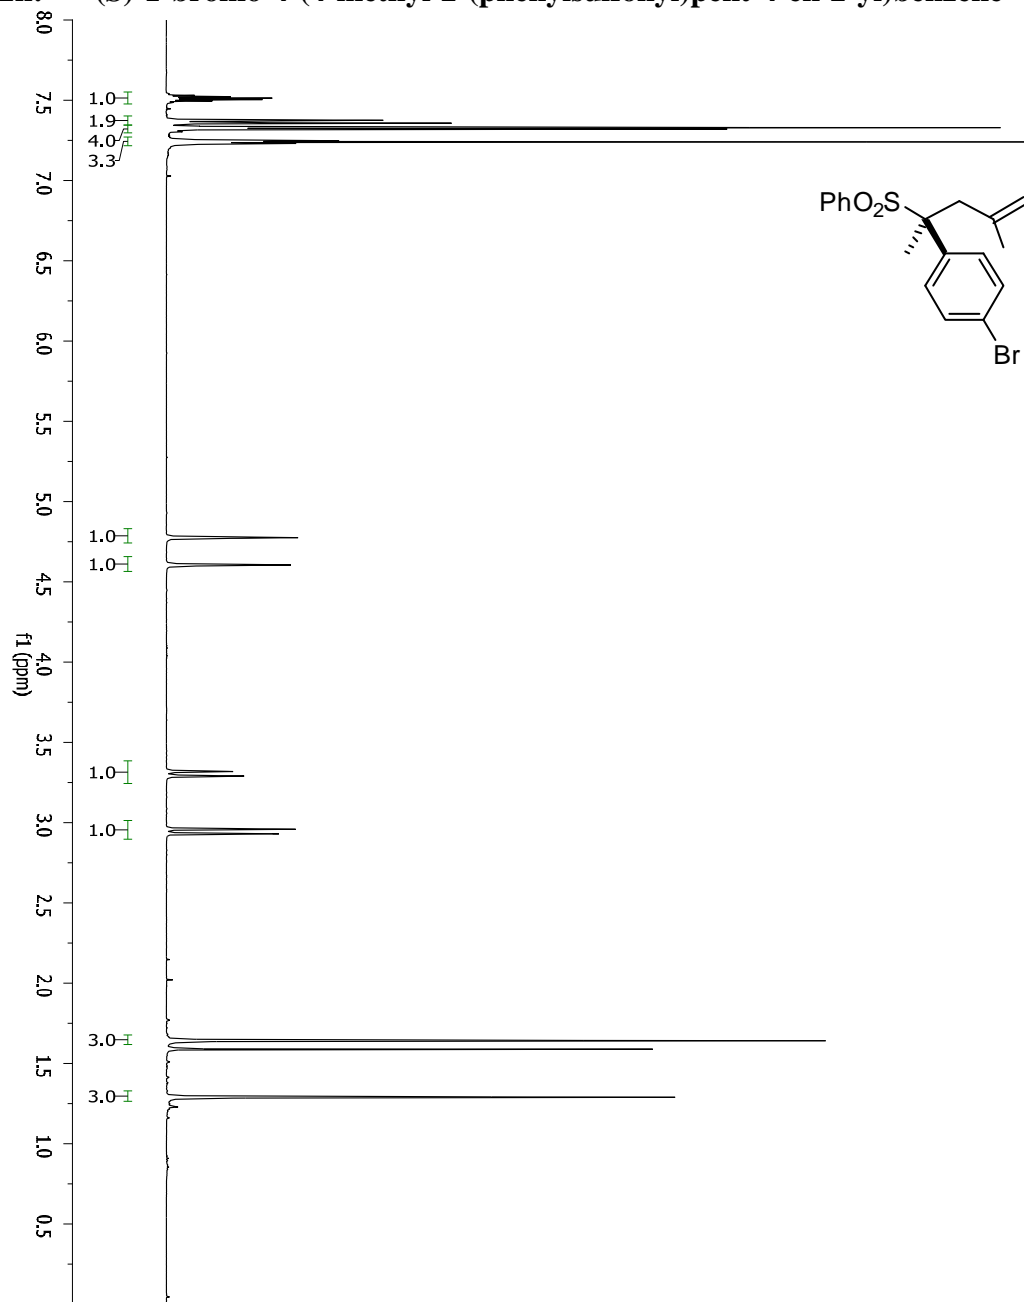

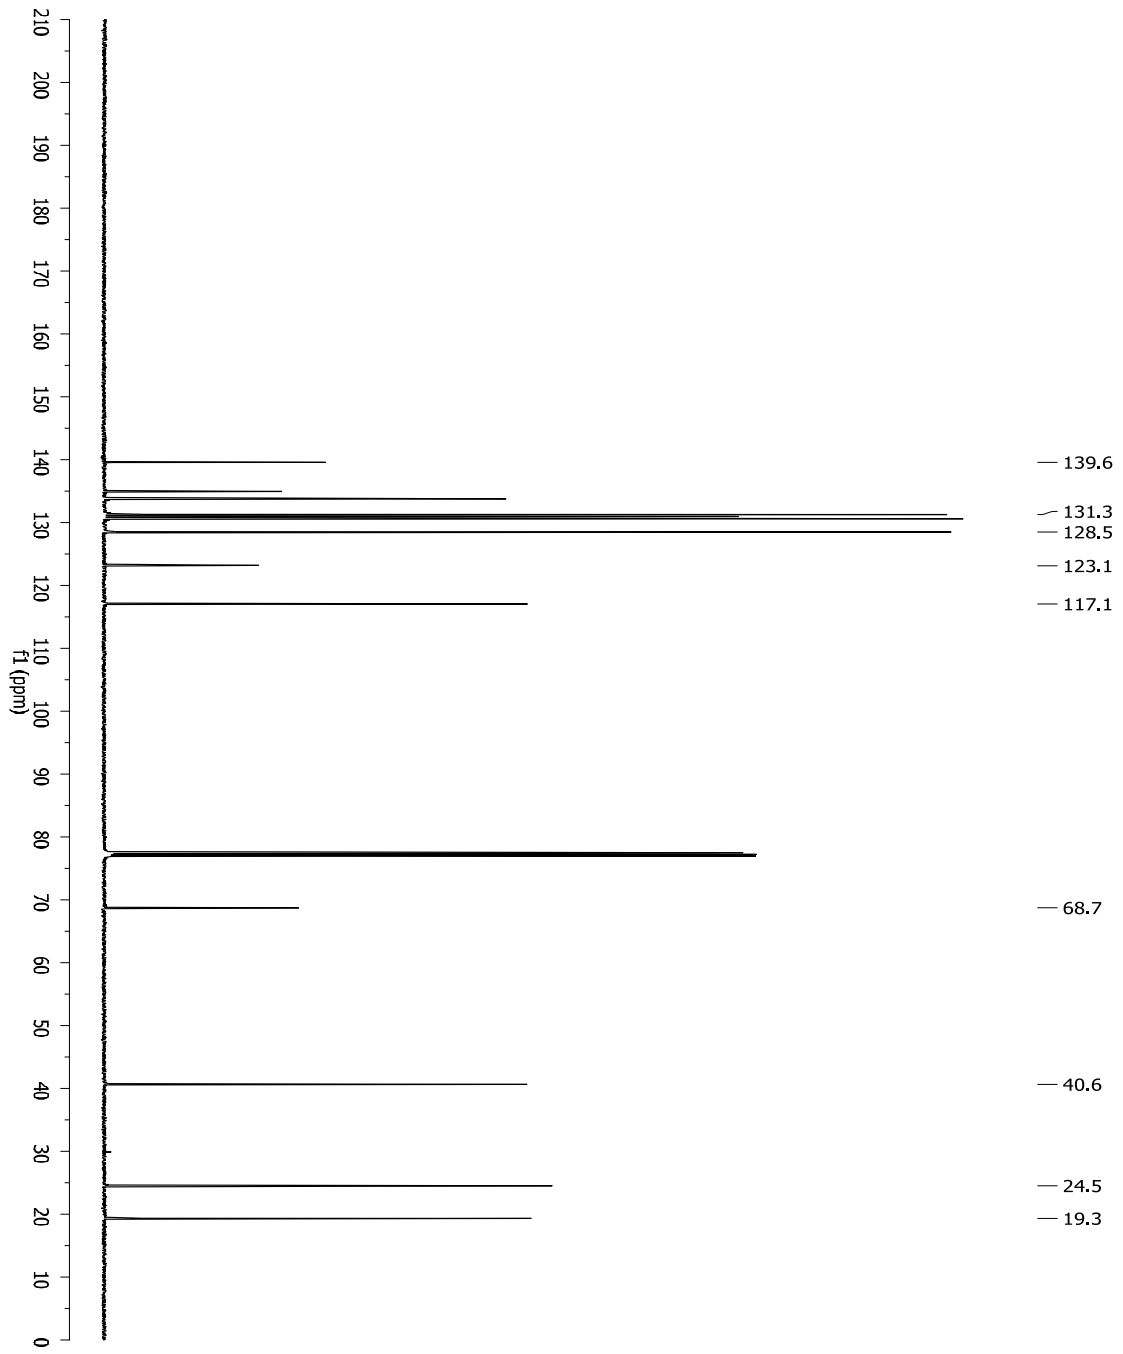

**2i: (S)-tert-butyl dimethyl(3-methyl-3-(phenylsulfonyl)hex-5-enyloxy)silane**

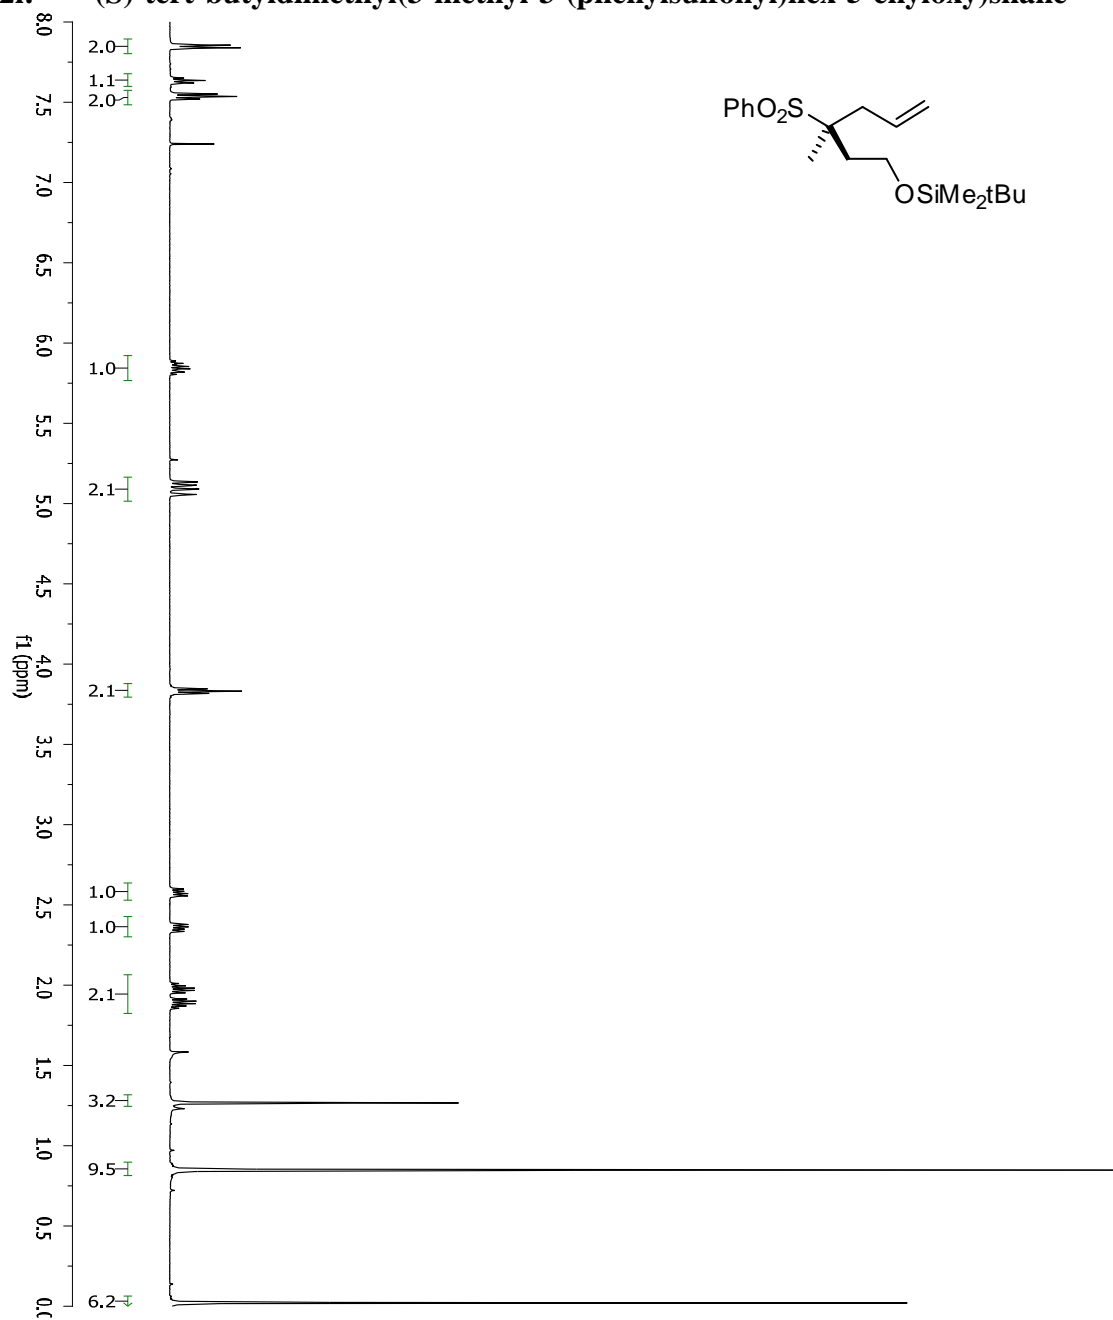

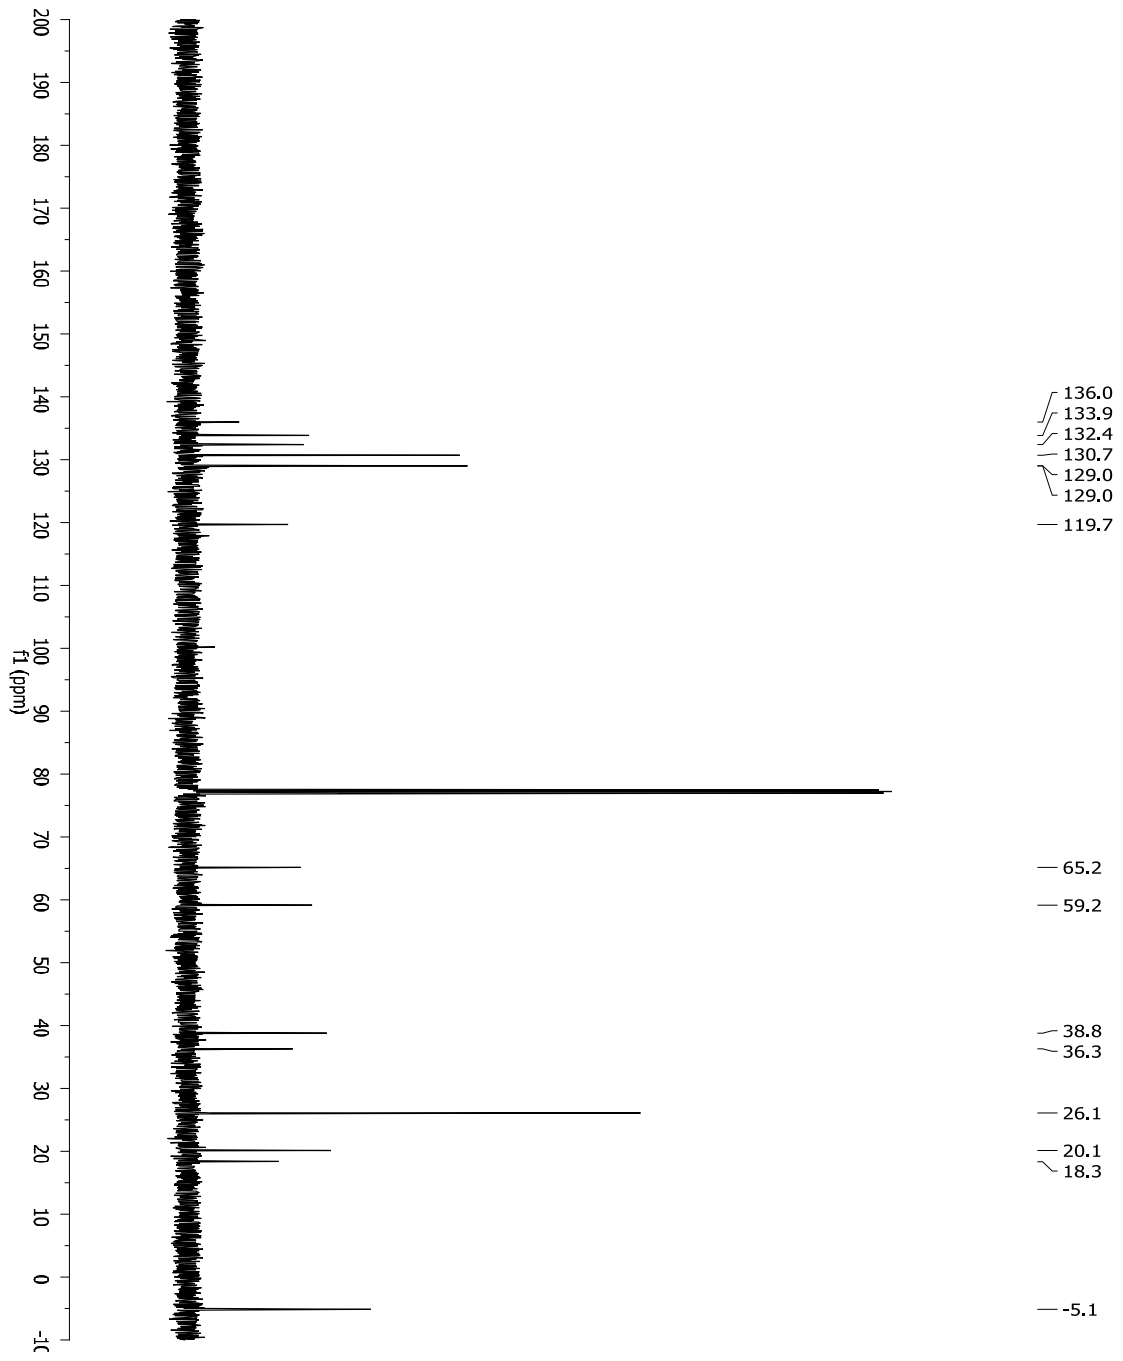



2j: (S)-1-methoxy-4-(3-methyl-3-(phenylsulfonyl)hex-5-enyloxy)benzene

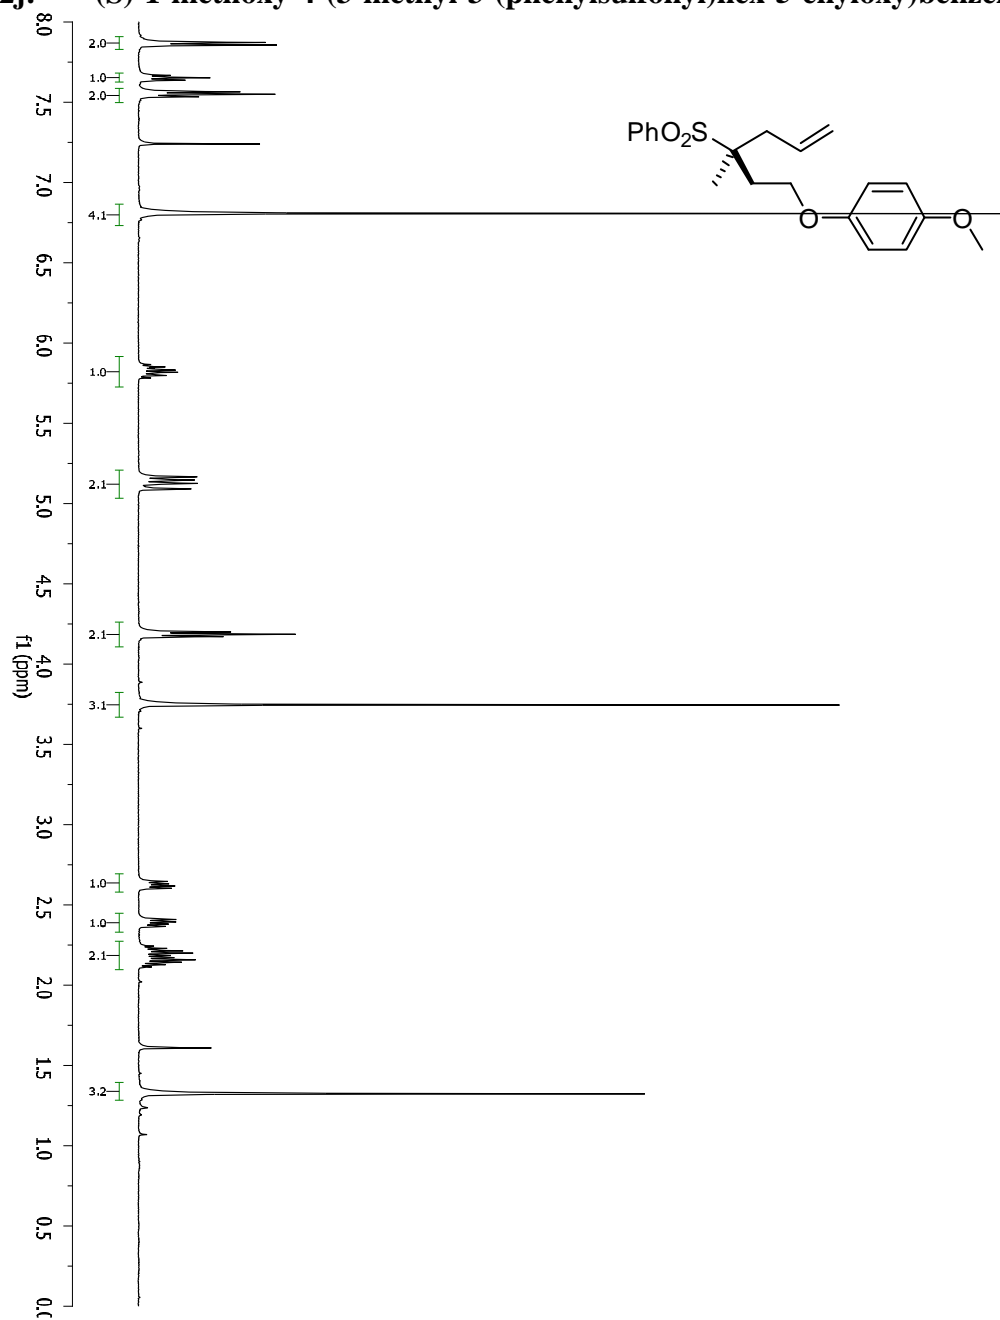

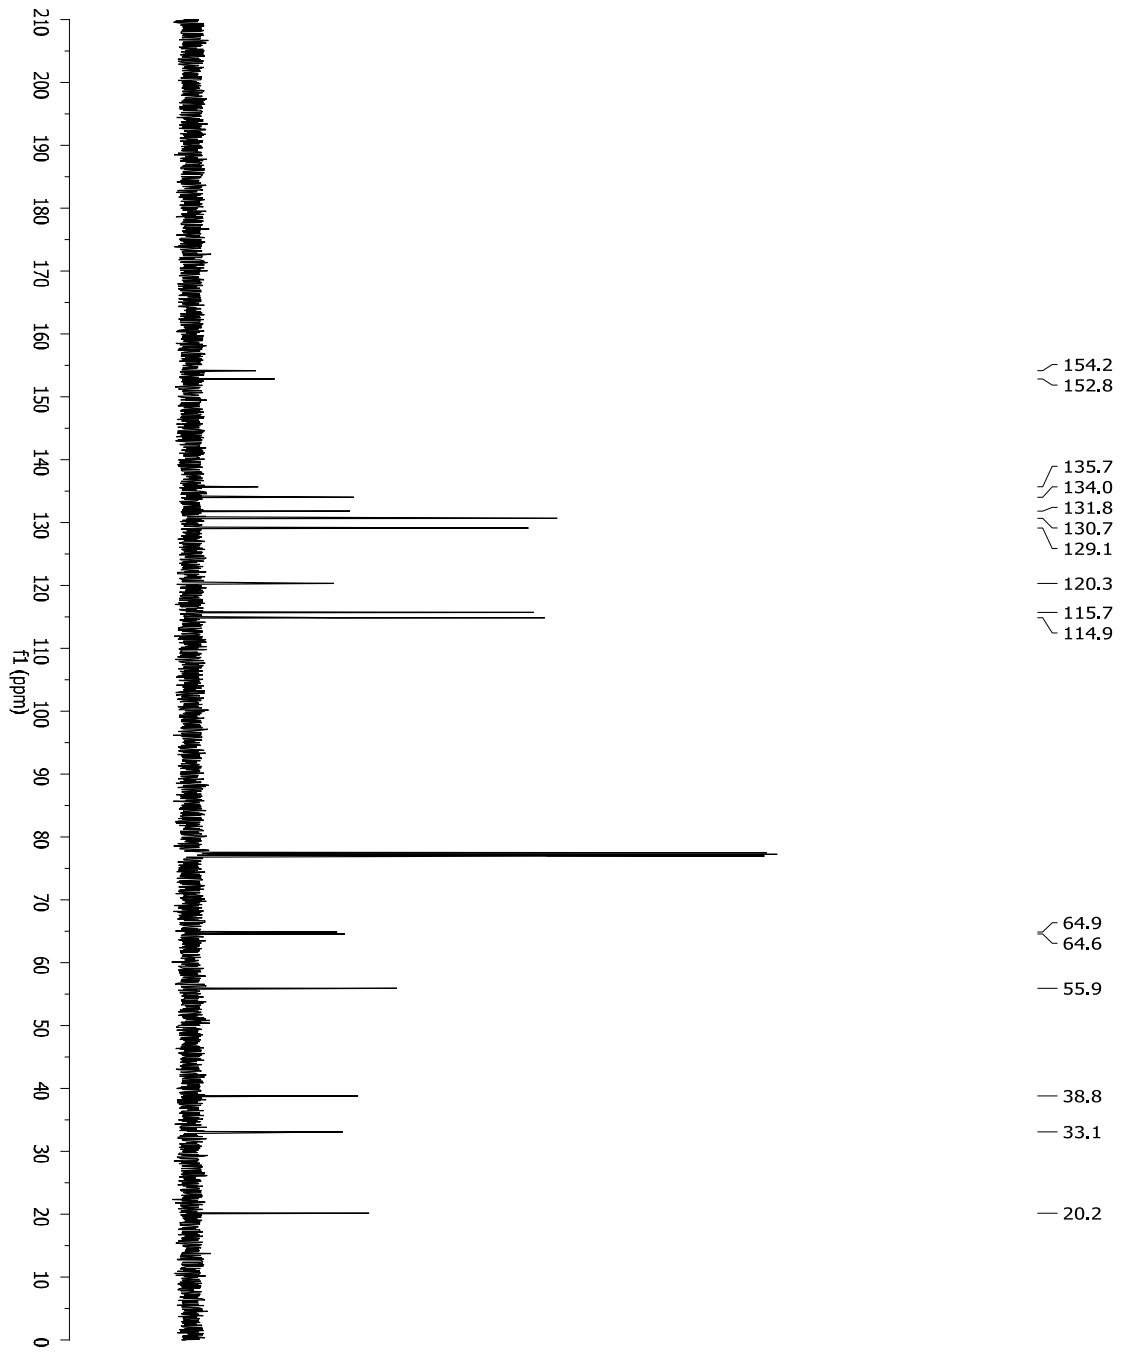

**2l: (R)-(2-methyl-1-phenylpent-4-en-2-ylsulfonyl)benzene**

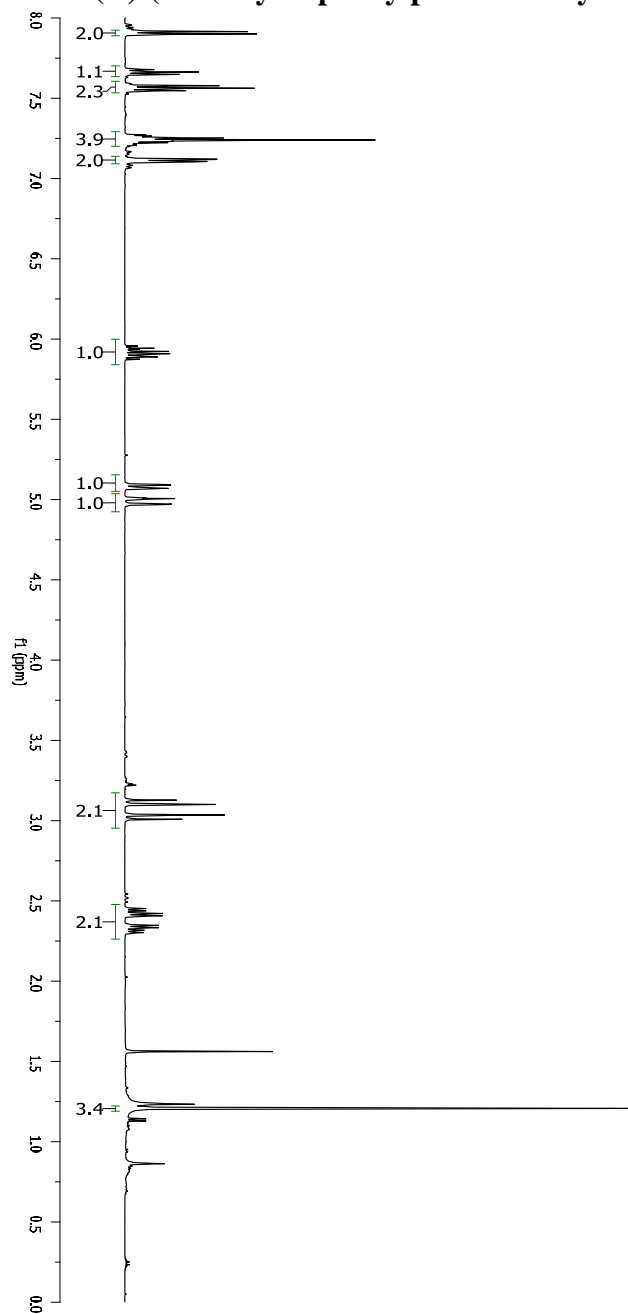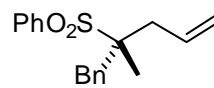

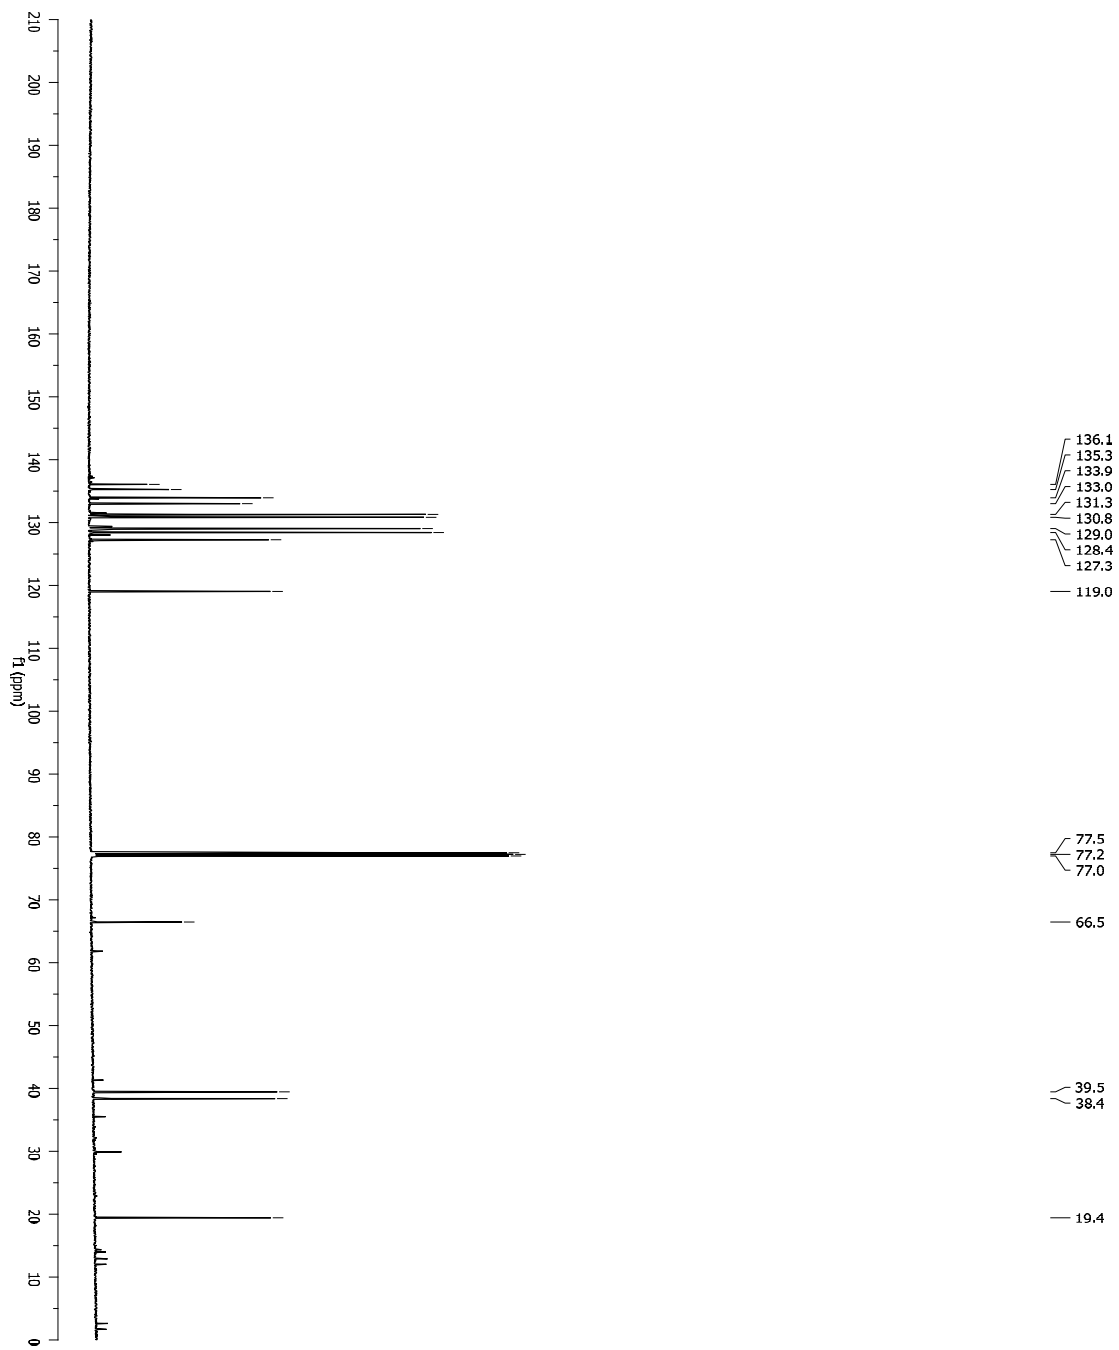

2m: (R)-(2,4-dimethyl-1-phenylpent-4-en-2-ylsulfonyl)benzene

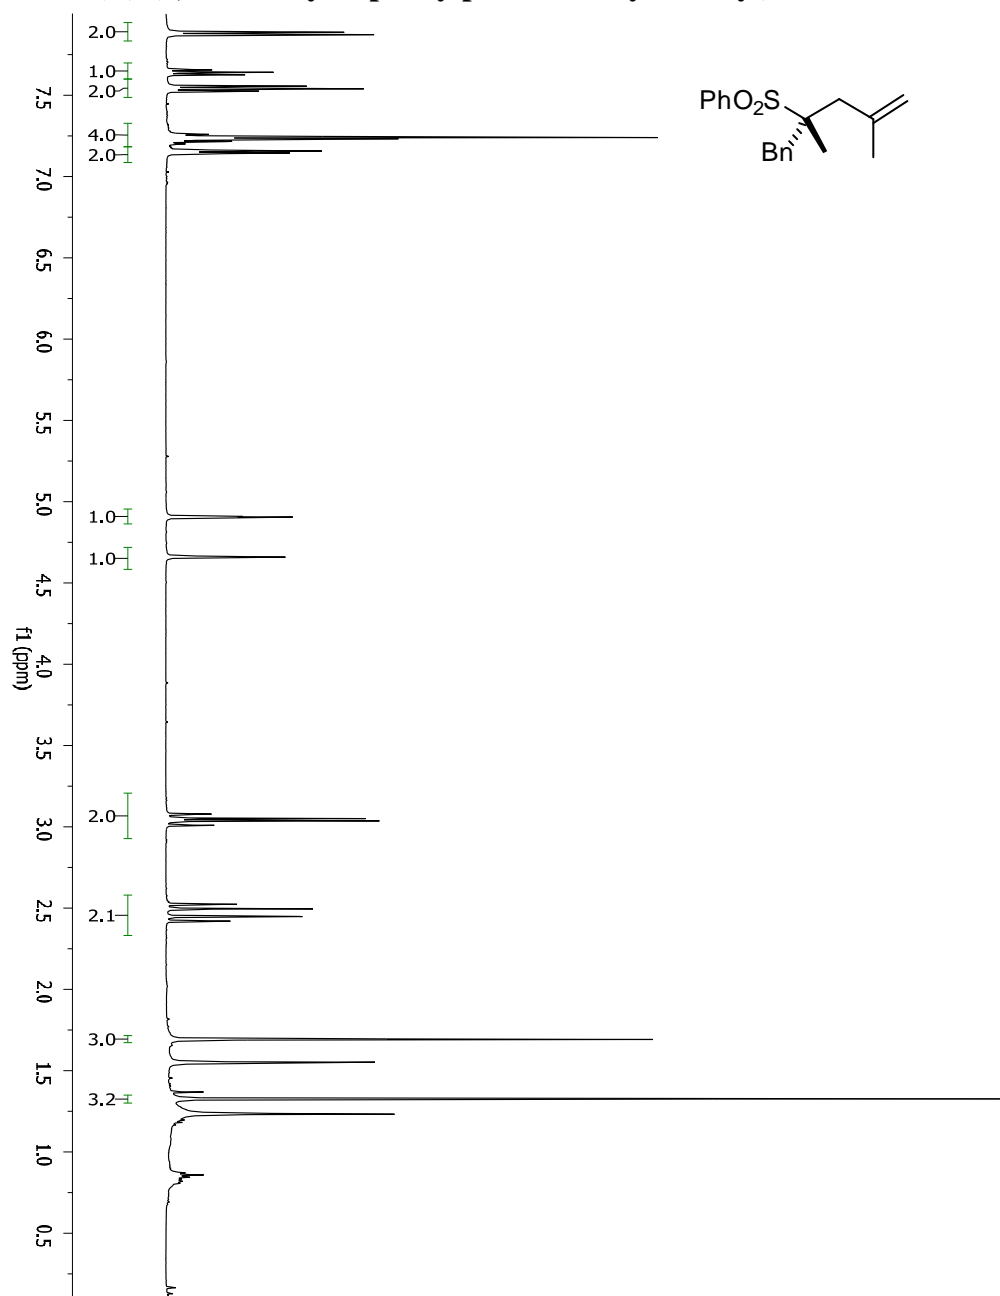

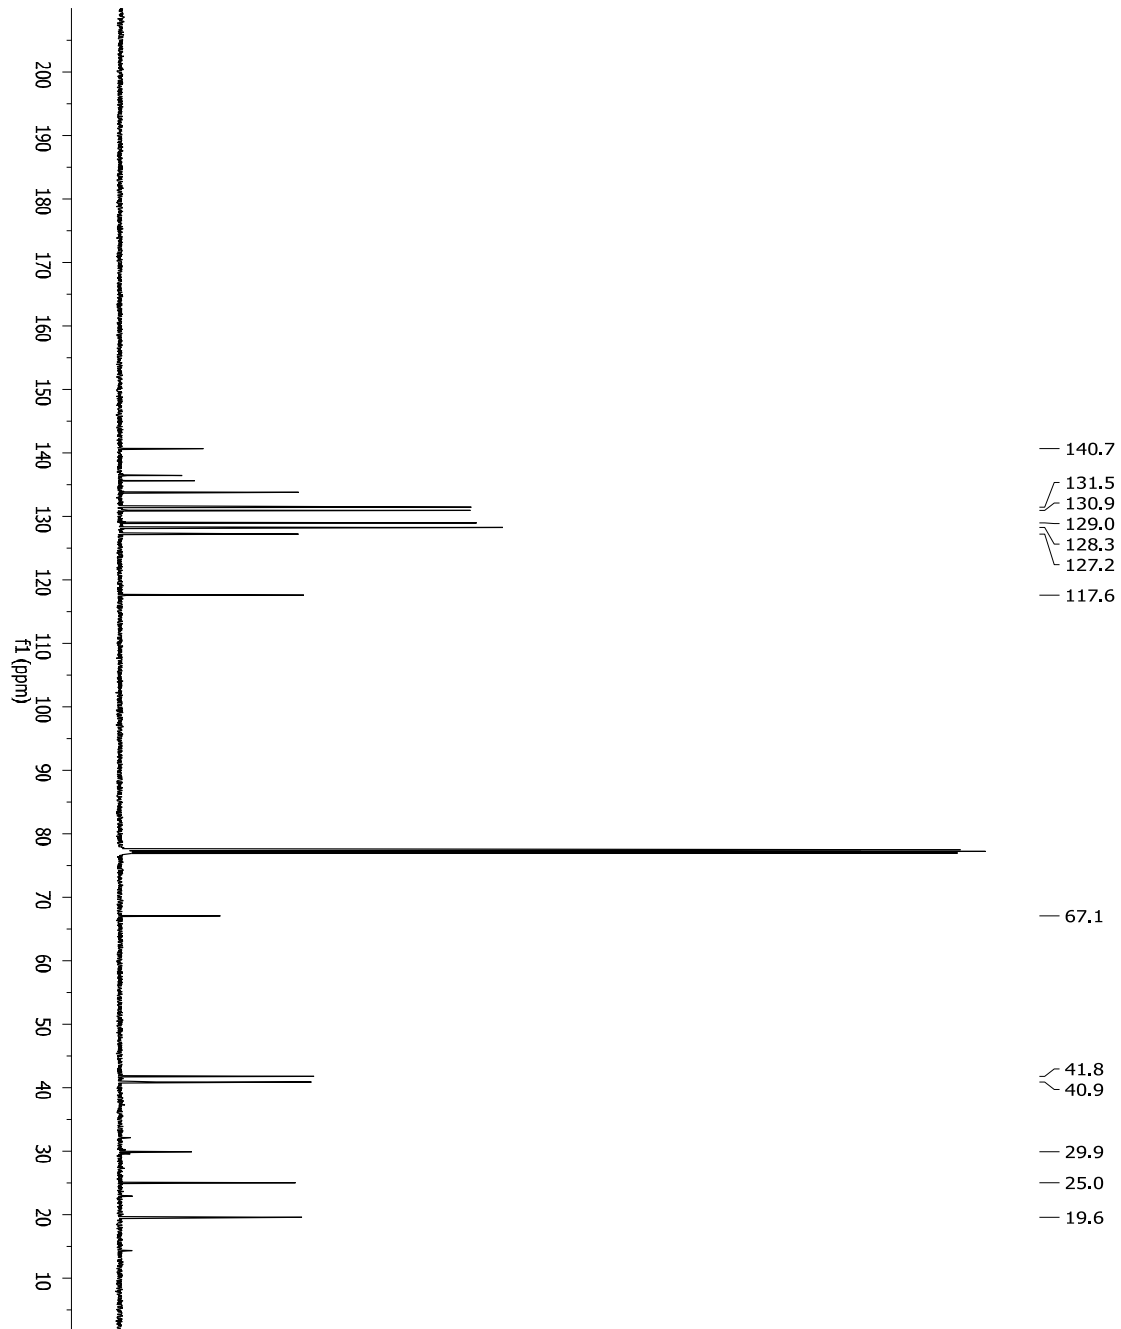

4: (R)-1-methoxy-4-(3-methyl-3-(phenylsulfonyl)hexyloxy)benzene

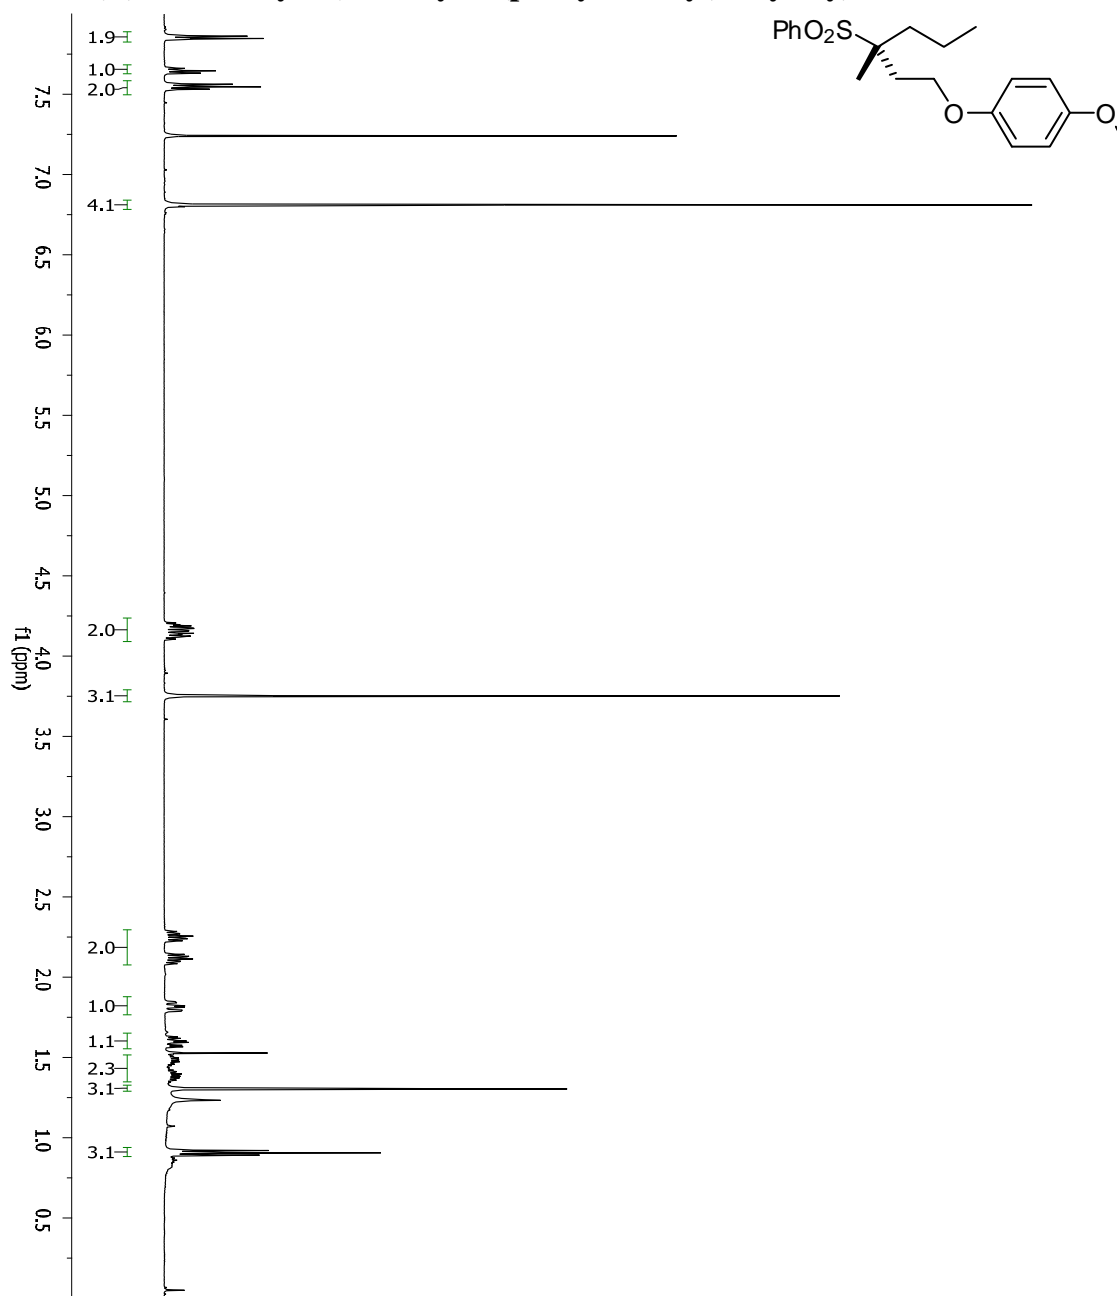

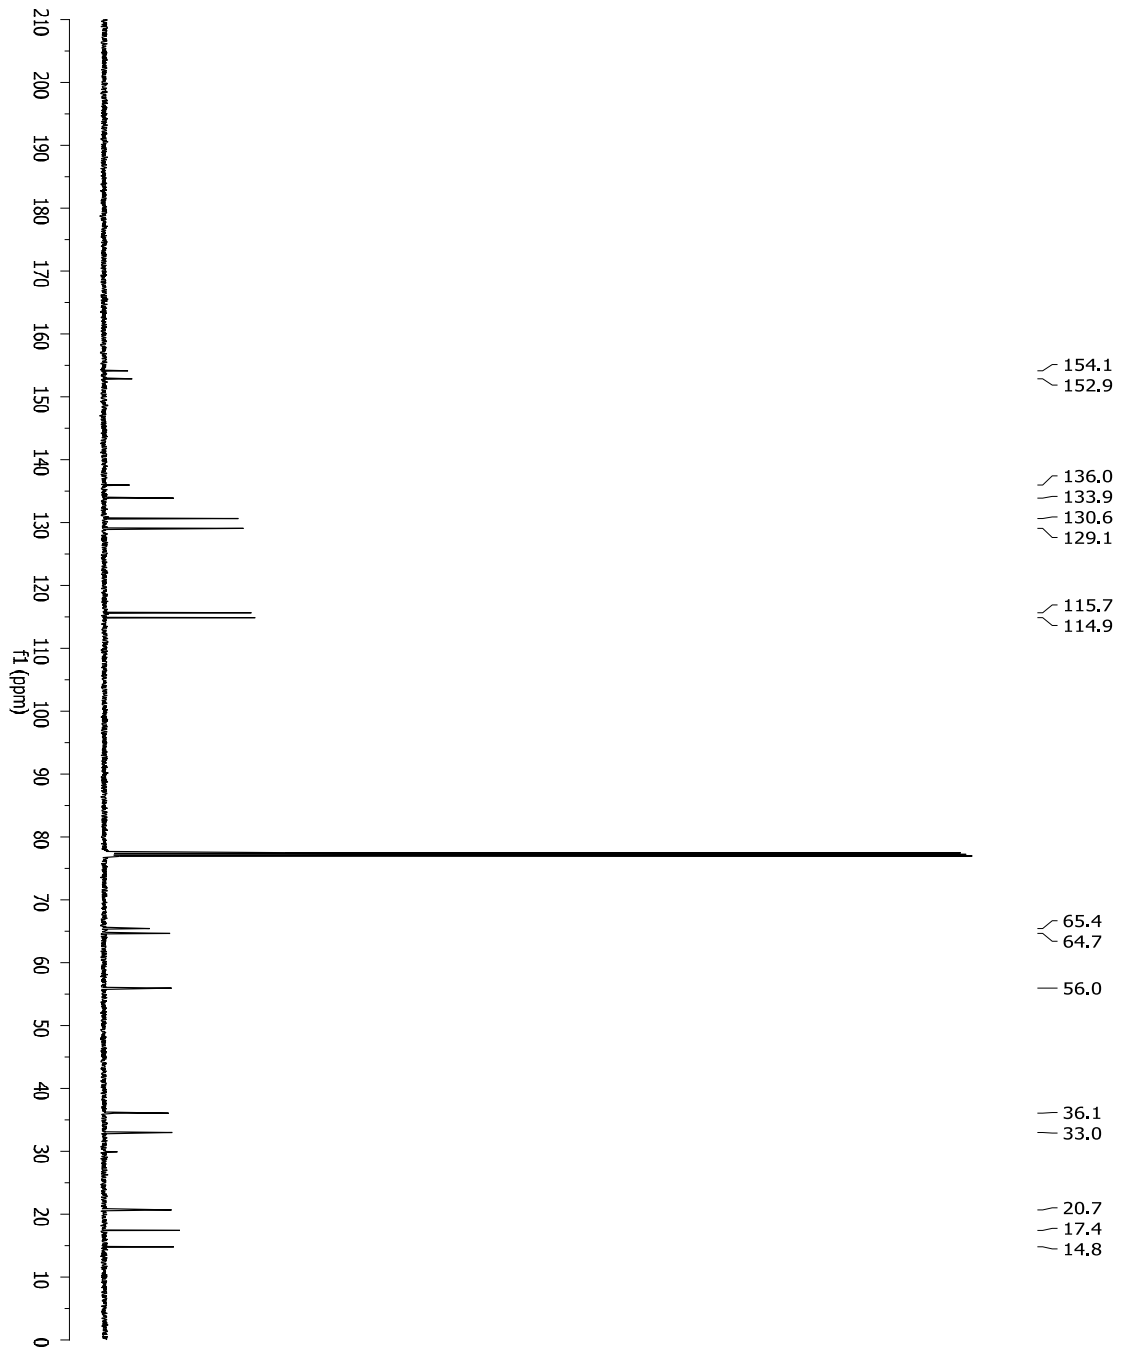



**1n: Syn-methyl enecarboxylate**

**5-(2-chloro-2-phenyl-2-(phenylsulfonyl)acetoxy)cyclohex-3-**

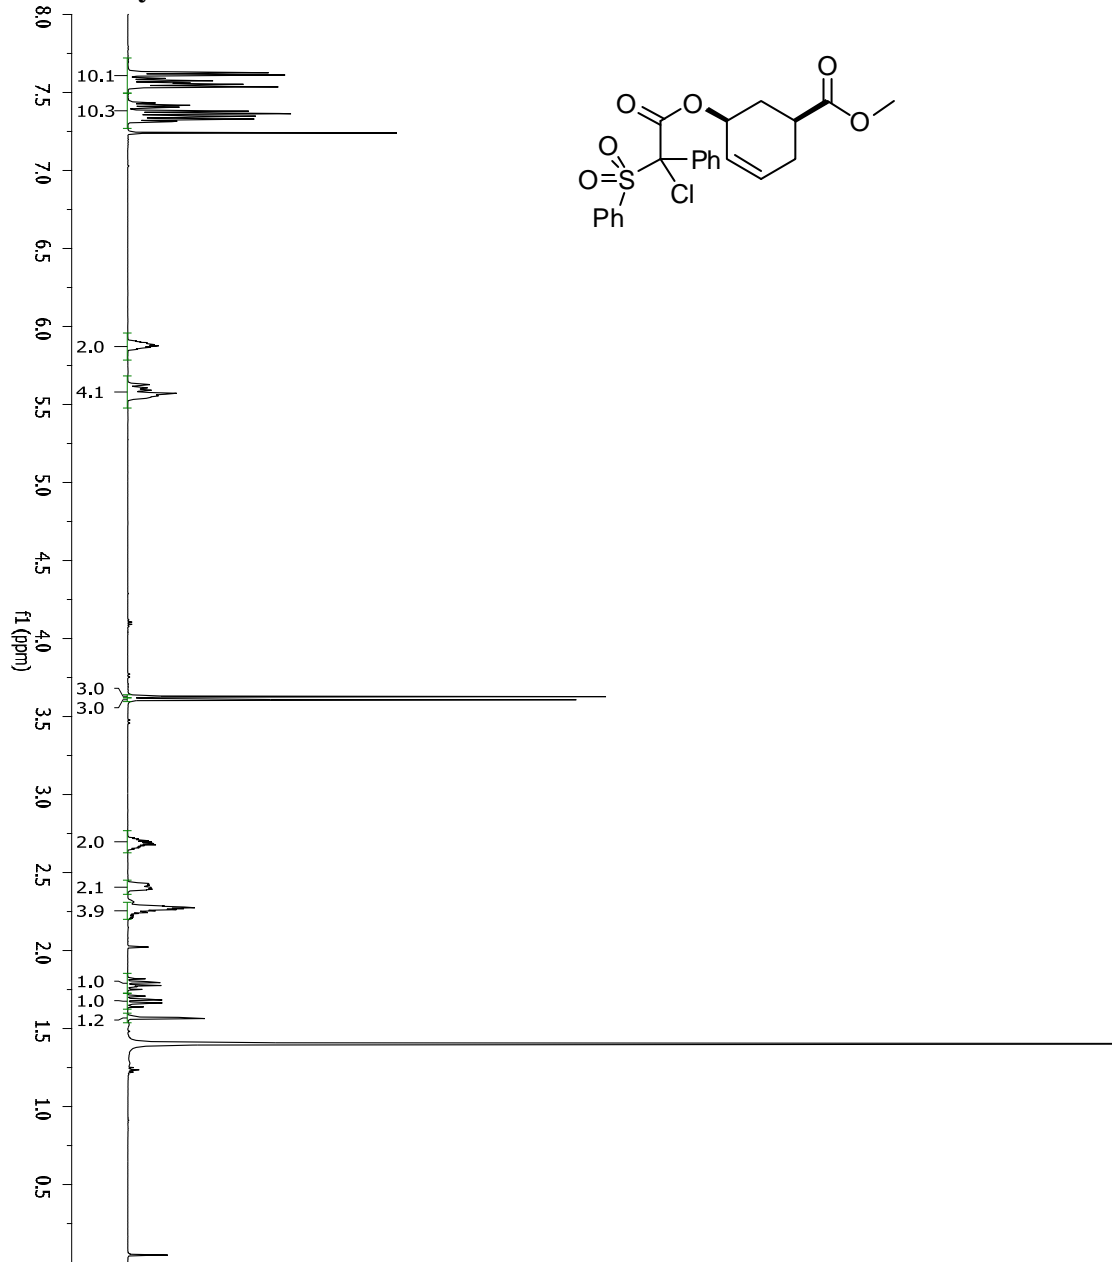

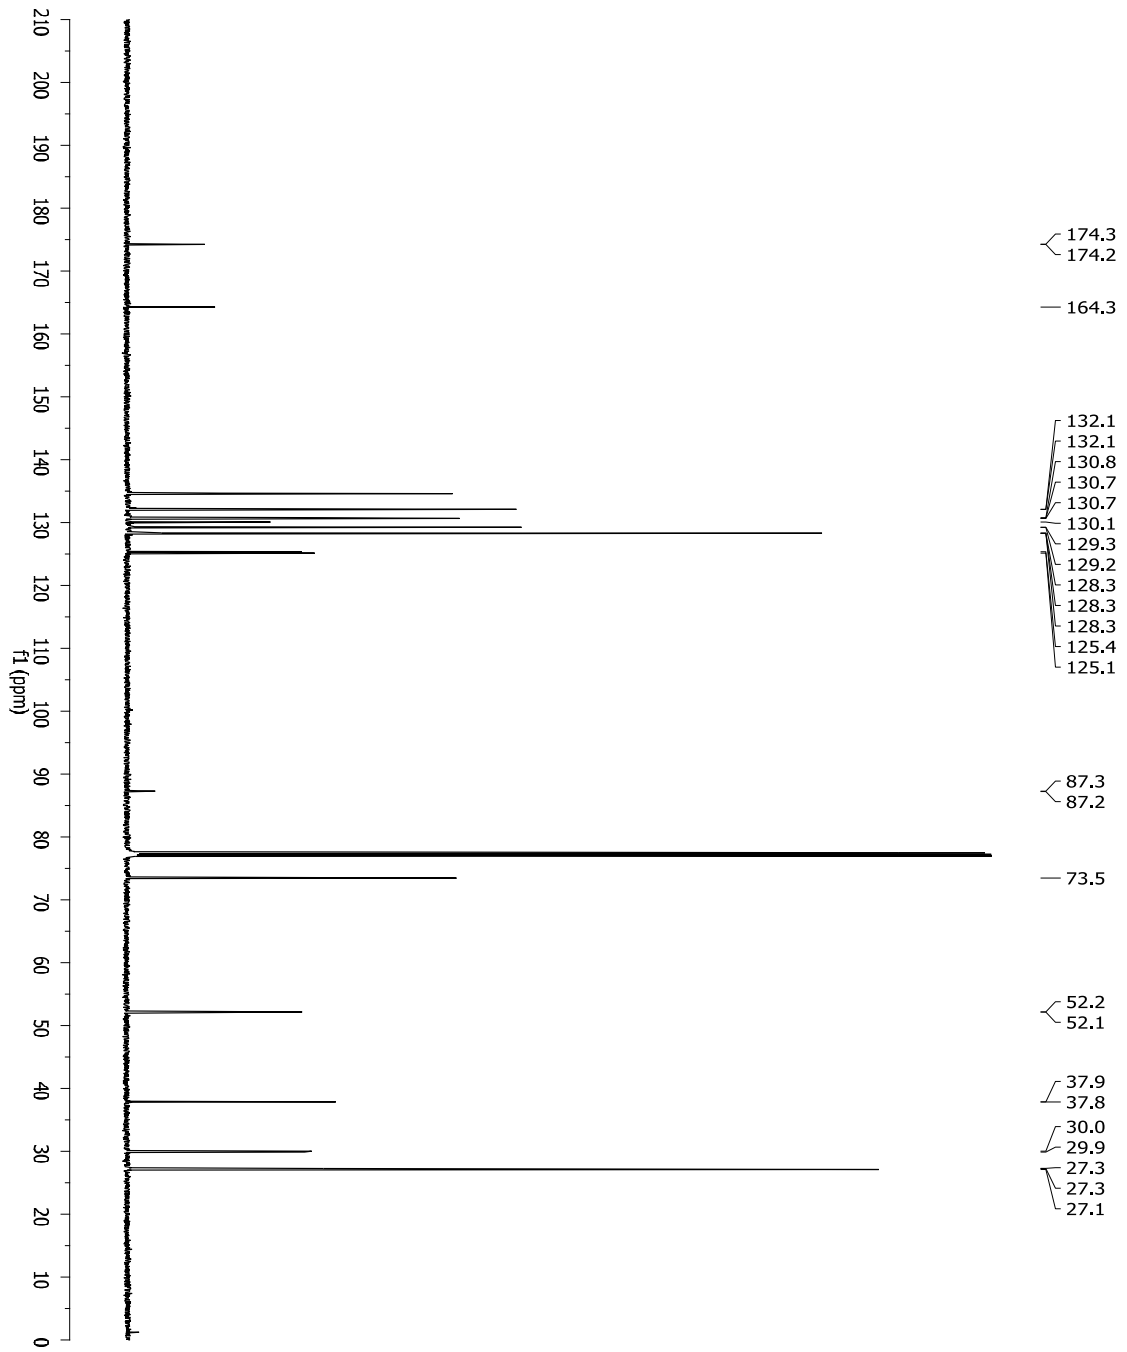

**2n'** Syn-methyl 5-(chloro (phenyl) (phenylsulfonyl) methyl)cyclohex-3-enecarboxylate (*Minor* diastereomer in late fractions)

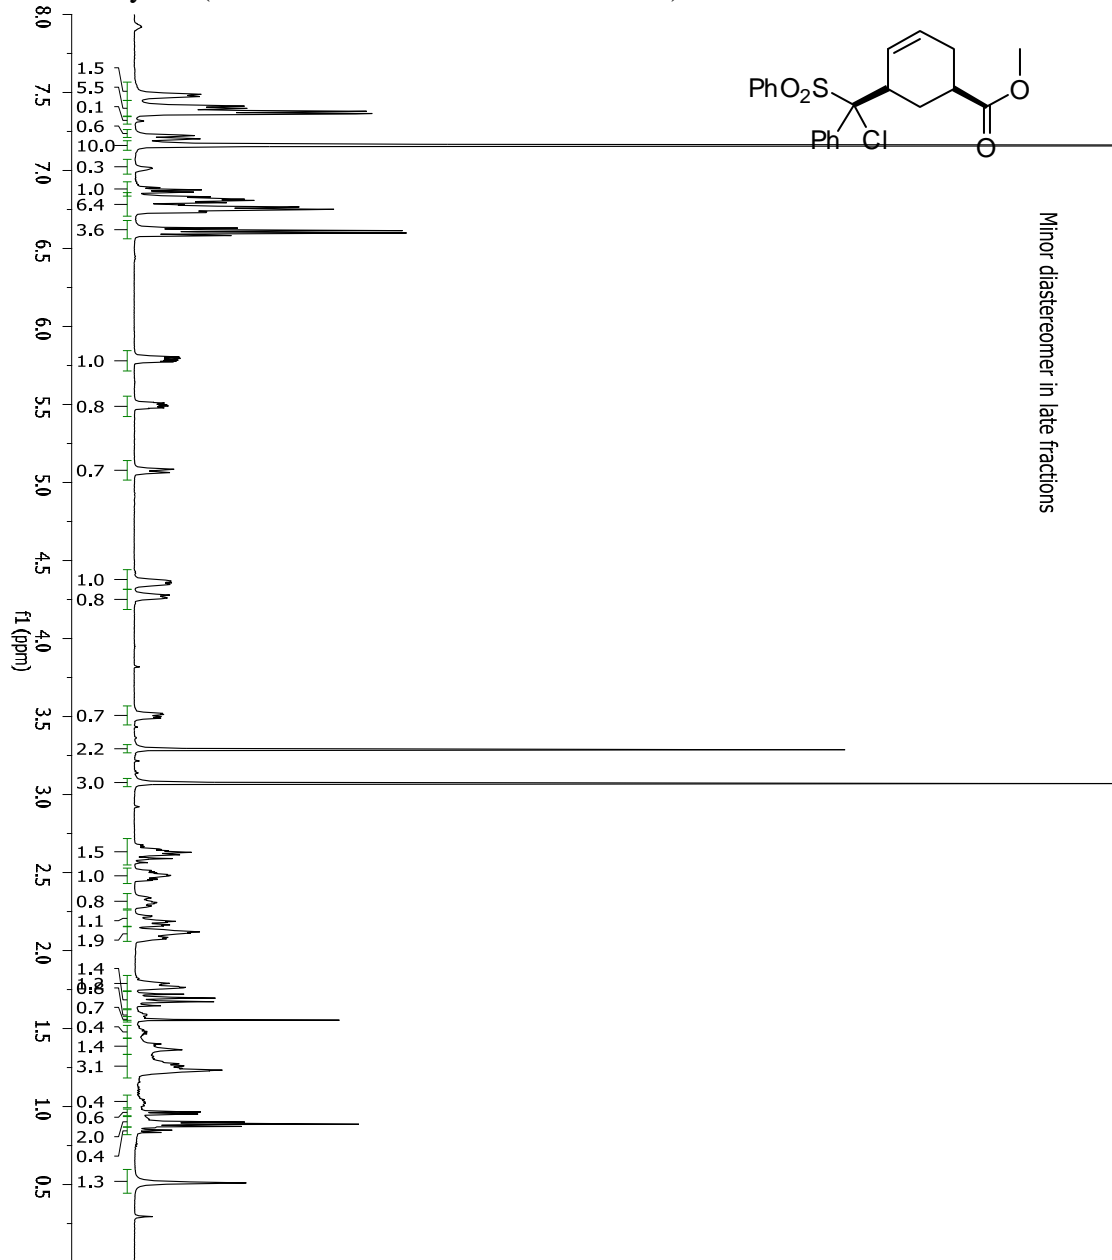

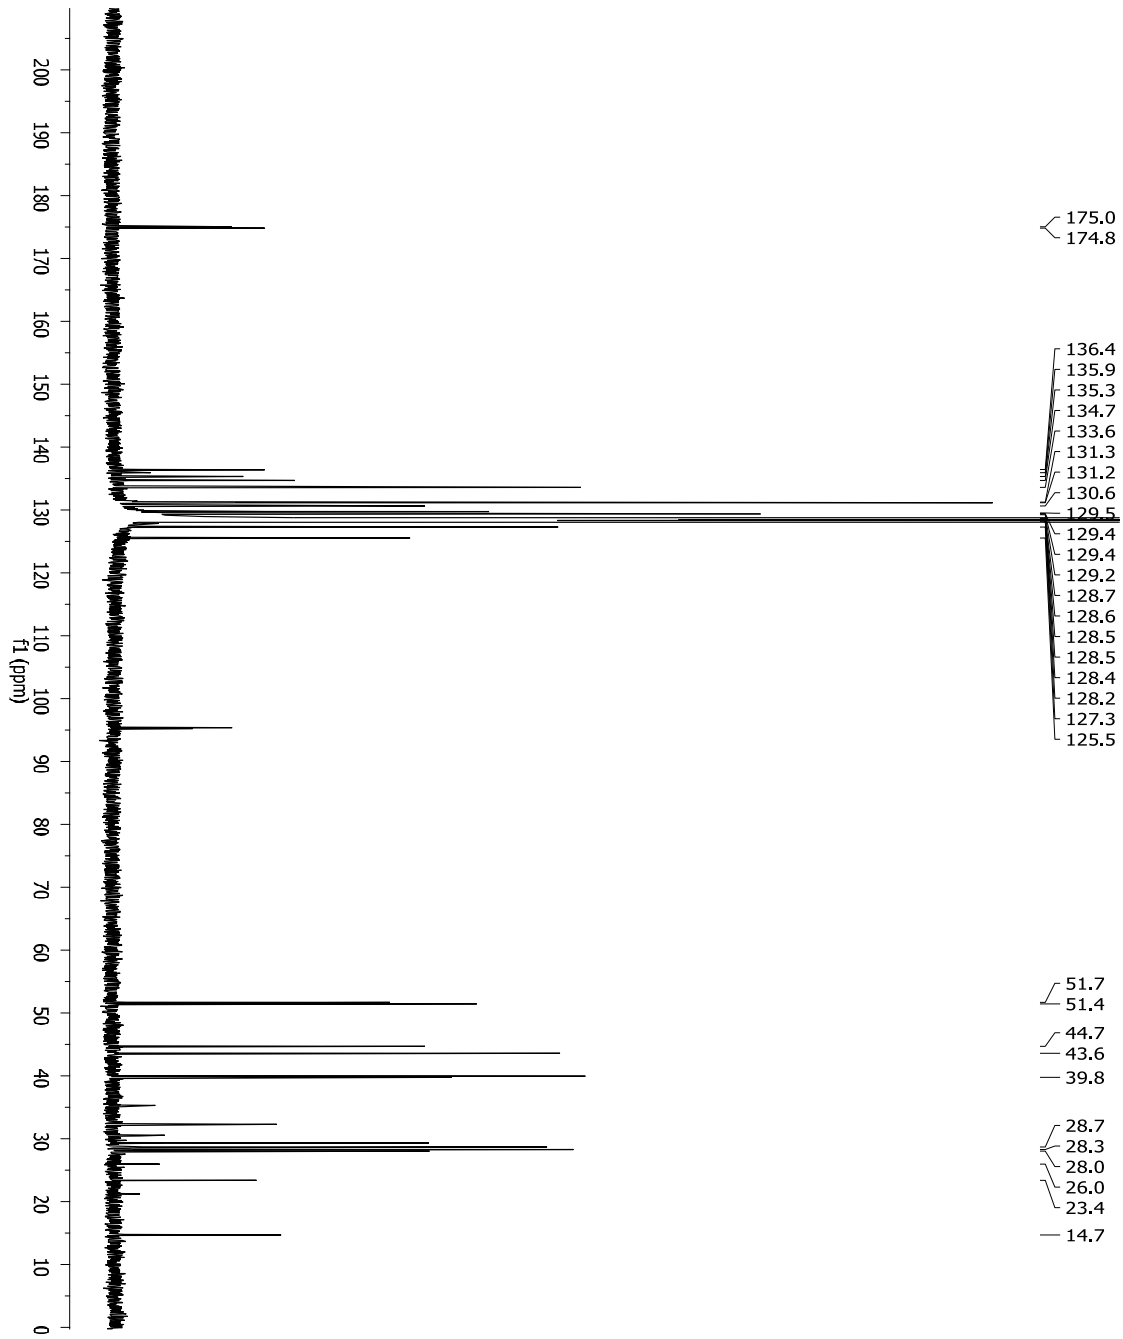

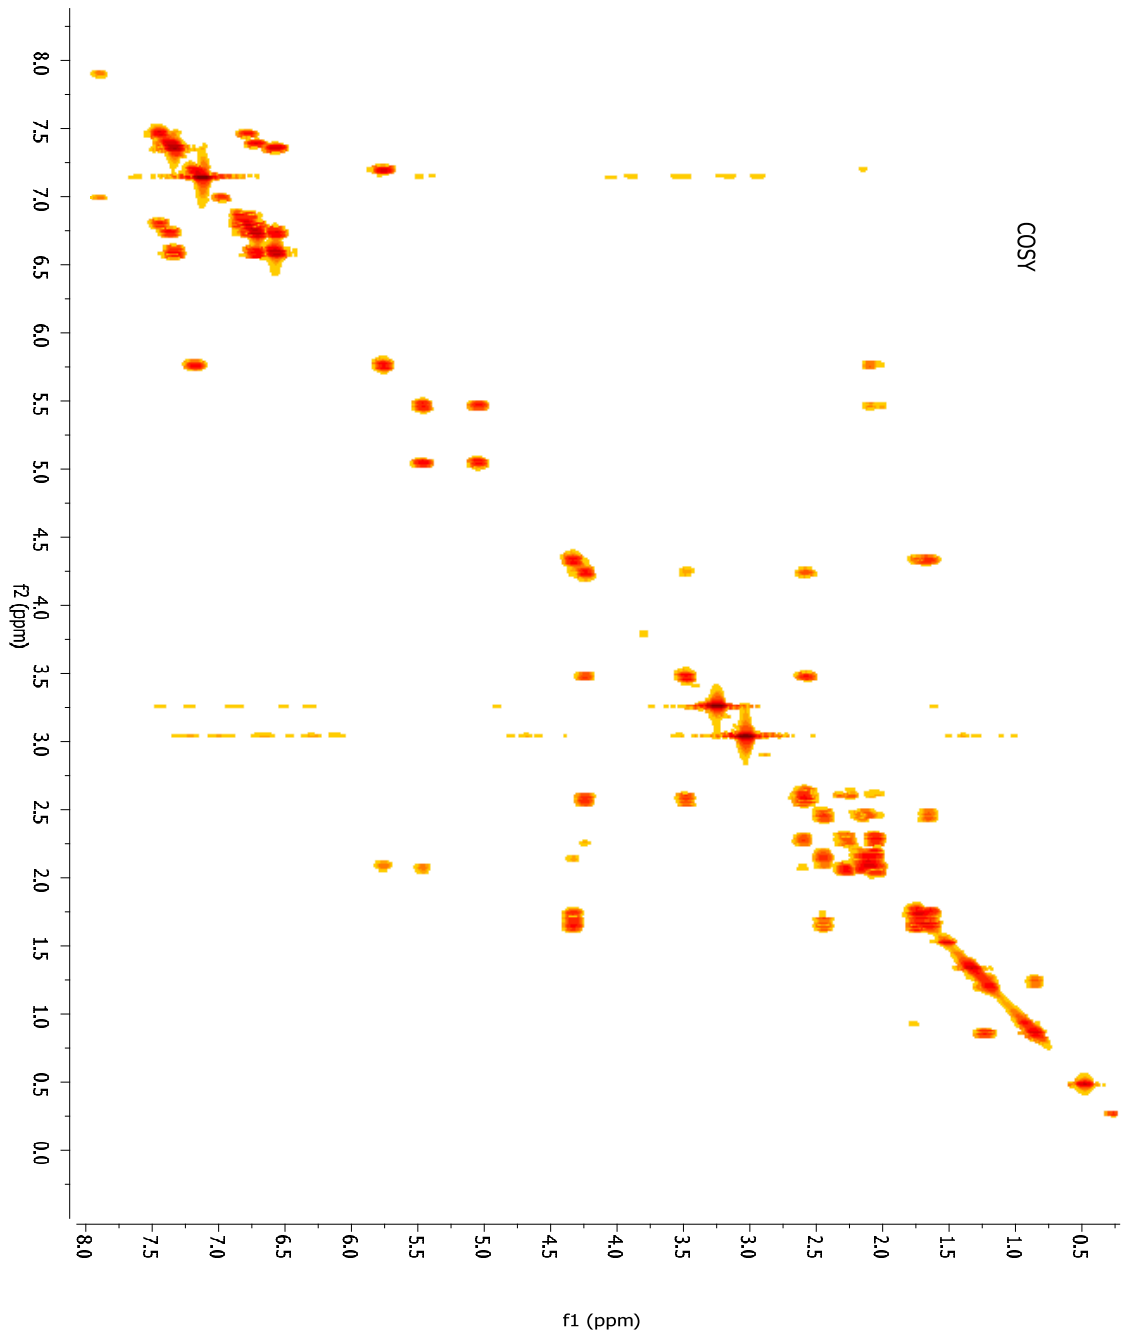

DEPT

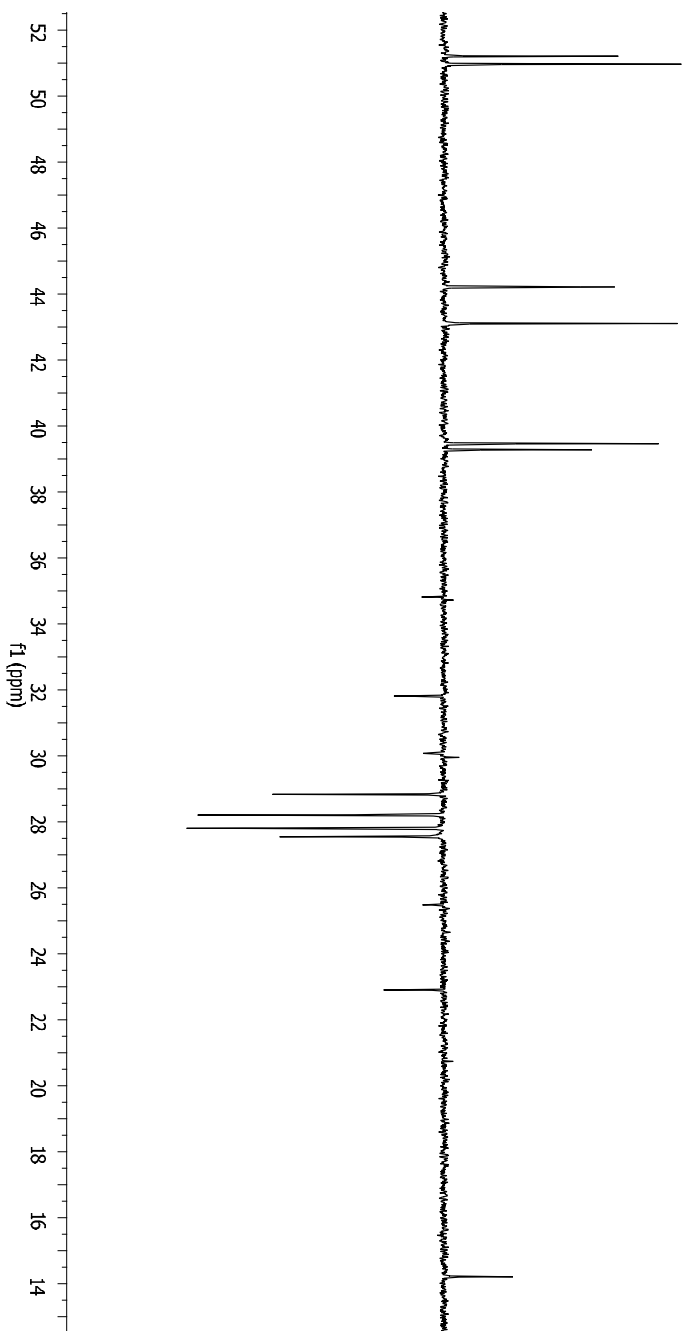

HSQC

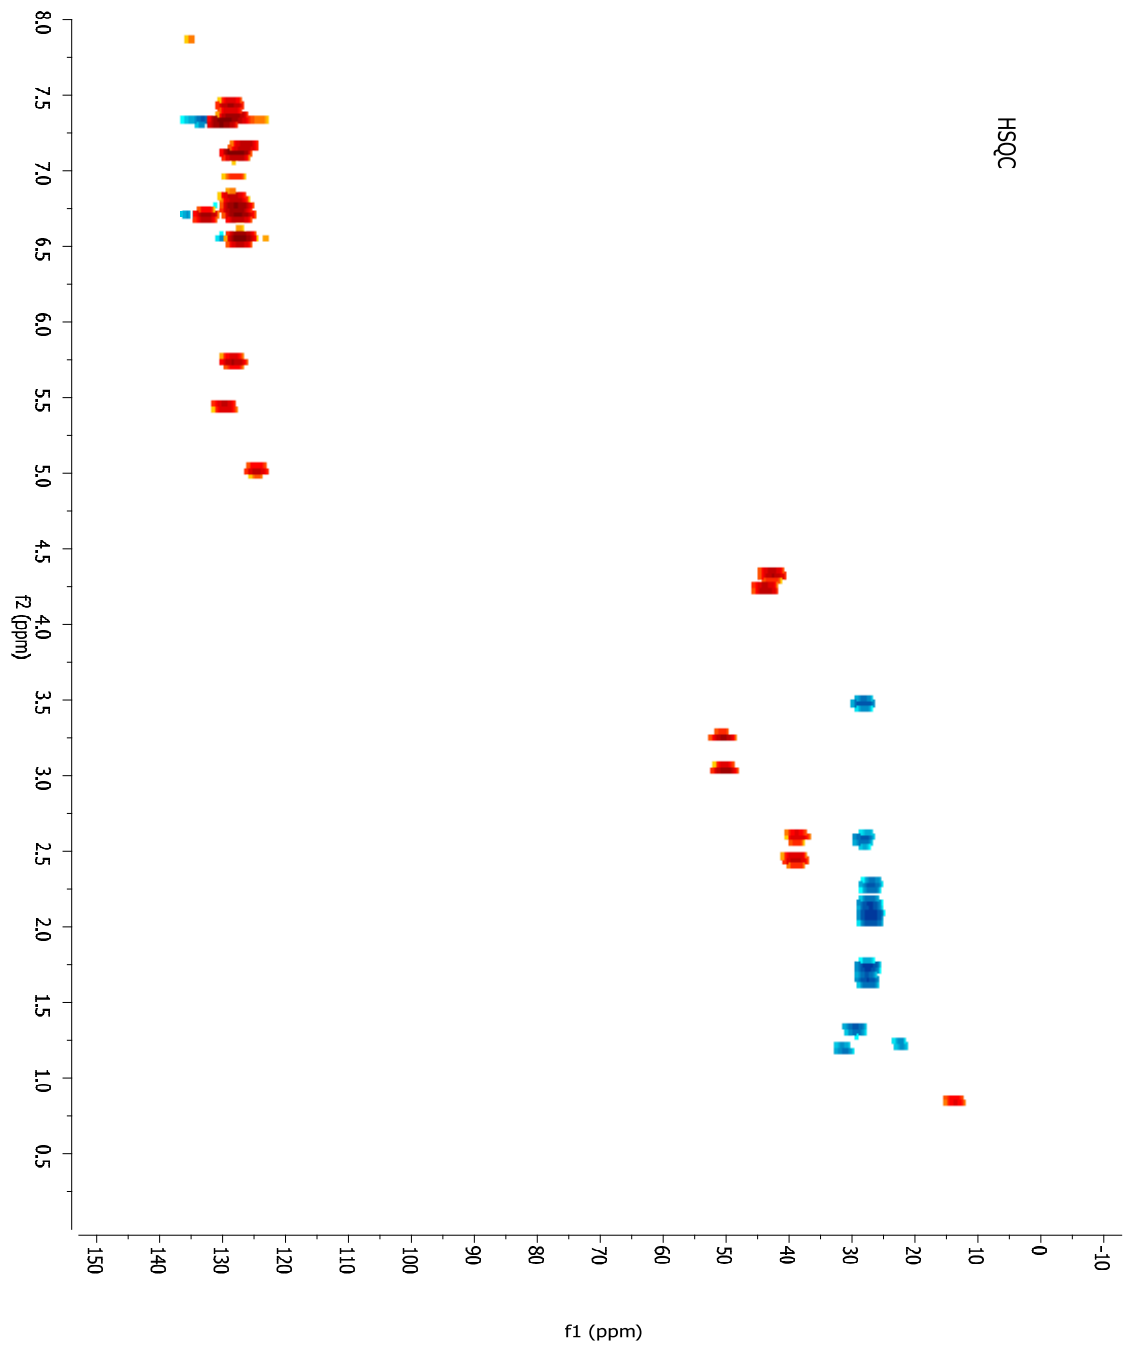

**2n'** Syn-methyl 5-(chloro (phenyl) (phenylsulfonyl) methyl)cyclohex-3-enecarboxylate (*Major diastereomer in late fractions*)

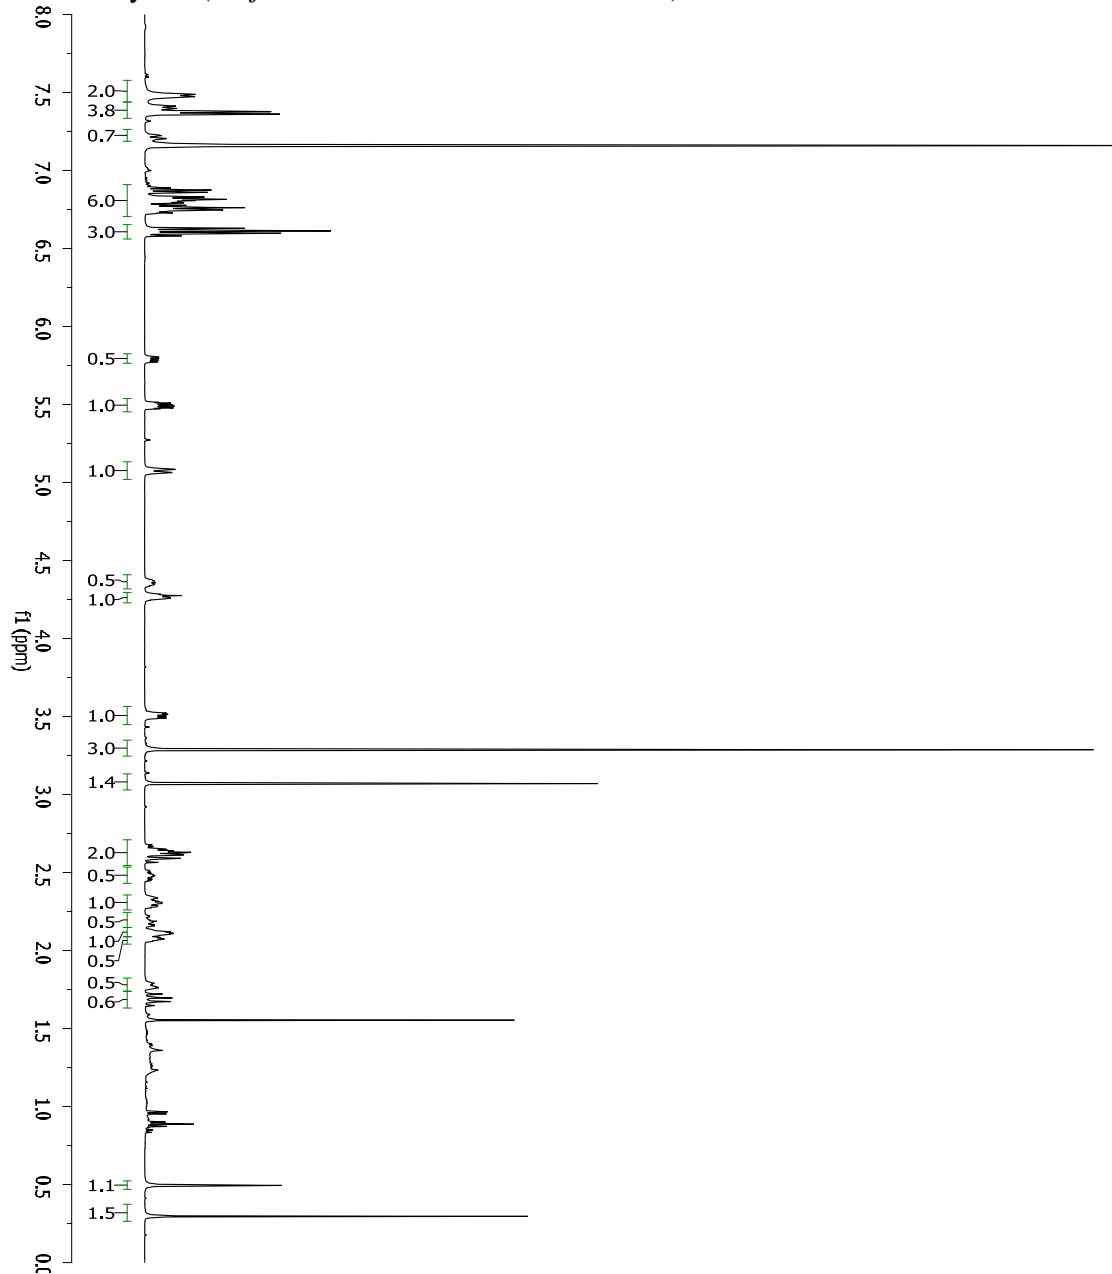

Supplement: NIHMS229920-supplement-2_si_002.pdf [file NIHMS229920-supplement-2_si_002.pdf]
